# Supplementary material for: Excessive Drinking Among Men Who Have Sex With Men Recruited From Web-Based Resources: Cross-sectional Questionnaire Study
Source: PubMed Central journal article supplement (PMC9664322; doi:10.2196/32888), 2022-10-31
Supplement: publichealth_v8i10e32888_app2.pdf [file publichealth_v8i10e32888_app2.pdf]

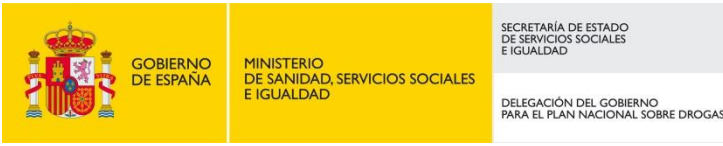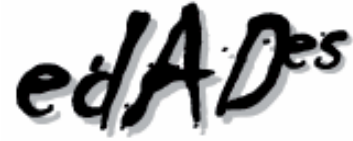

CUESTIONARIO AUTORRELLENABLE

ENCUESTA SOBRE ALCOHOL Y DROGAS EN ESPAÑA 2017

|                              |                      |                      |                      |                      |
|------------------------------|----------------------|----------------------|----------------------|----------------------|
| Nº DE RUTA .....             | <input type="text"/> | <input type="text"/> | <input type="text"/> | <input type="text"/> |
| PROVINCIA .....              | <input type="text"/> | <input type="text"/> | <input type="text"/> | <input type="text"/> |
| MUNICIPIO .....              | <input type="text"/> | <input type="text"/> | <input type="text"/> | <input type="text"/> |
| DISTRITO .....               | <input type="text"/> | <input type="text"/> | <input type="text"/> | <input type="text"/> |
| SECCIÓN .....                | <input type="text"/> | <input type="text"/> | <input type="text"/> | <input type="text"/> |
| Nº DE HOGAR EN LA RUTA ..... | <input type="text"/> | <input type="text"/> | <input type="text"/> | <input type="text"/> |
| Nº DE ENTREVISTADOR/A .....  | <input type="text"/> | <input type="text"/> | <input type="text"/> | <input type="text"/> |
| Nº DE CUESTIONARIO .....     | <input type="text"/> | <input type="text"/> | <input type="text"/> | <input type="text"/> |

**INSTRUCCIONES PARA EL ENTREVISTADO/A**

En algunas preguntas se indaga sobre el **número de días** que usted ha consumido una determinada sustancia. Para orientarse sobre cómo debe responder a este tipo de preguntas revise, por favor, el siguiente ejemplo:

**¿Cuántos días tomó usted una o más bebidas alcohólicas durante los ÚLTIMOS 12 MESES?**

Primero lea, una a una, todas las categorías de las respuestas encerradas en la tabla situada abajo. Puede que necesite hacer un pequeño esfuerzo de memoria y realizar un cálculo aproximado para seleccionar la categoría que le corresponde.

**Recuerde que 12 meses=52 semanas=365 días**

|                    |                          |   |                                                               |                          |   |
|--------------------|--------------------------|---|---------------------------------------------------------------|--------------------------|---|
| ENTRE 1 – 3 DÍAS   | <input type="checkbox"/> | 1 | ENTRE 30 – 150 DÍAS                                           | <input type="checkbox"/> | 5 |
| ENTRE 4 – 9 DÍAS   | <input type="checkbox"/> | 2 | MAS DE 150 DÍAS                                               | <input type="checkbox"/> | 6 |
| ENTRE 10 – 19 DÍAS | <input type="checkbox"/> | 3 | NO HE TOMADO BEBIDAS ALCOHÓLICAS DURANTE LOS ÚLTIMOS 12 MESES | <input type="checkbox"/> | 7 |
| ENTRE 20 – 29 DÍAS | <input type="checkbox"/> | 4 | NUNCA HE TOMADO BEBIDAS ALCOHÓLICAS                           | <input type="checkbox"/> | 8 |

**Lea atentamente, y si lo necesita consulte con el entrevistador/a.**

- Usted deberá marcar, tal como aparece en la tabla de más abajo, **la categoría “Entre 20-29 días” si en los ÚLTIMOS 12 MESES** sólo ha bebido en las celebraciones familiares tales como bautizos, bodas y cumpleaños. Esto podría equivaler a una media de 2 días al mes durante todo el año (12 meses) = **24 días**.

|                    |                                     |   |                                                               |                          |   |
|--------------------|-------------------------------------|---|---------------------------------------------------------------|--------------------------|---|
| ENTRE 1 – 3 DÍAS   | <input type="checkbox"/>            | 1 | ENTRE 30 – 150 DÍAS                                           | <input type="checkbox"/> | 5 |
| ENTRE 4 – 9 DÍAS   | <input type="checkbox"/>            | 2 | MAS DE 150 DÍAS                                               | <input type="checkbox"/> | 6 |
| ENTRE 10 – 19 DÍAS | <input type="checkbox"/>            | 3 | NO HE TOMADO BEBIDAS ALCOHÓLICAS DURANTE LOS ÚLTIMOS 12 MESES | <input type="checkbox"/> | 7 |
| ENTRE 20 – 29 DÍAS | <input checked="" type="checkbox"/> | 4 | NUNCA HE TOMADO BEBIDAS ALCOHÓLICAS                           | <input type="checkbox"/> | 8 |

- Si el consumo que ha realizado en **LOS ÚLTIMOS 12 MESES** se limita al fin de semana (entendiendo como tal viernes, sábados y domingos) = 3 días x 52 semanas = **156 días**. En este caso deberá marcar **la categoría “Más de 150 días”**.

|                    |                          |   |                                                               |                                     |   |
|--------------------|--------------------------|---|---------------------------------------------------------------|-------------------------------------|---|
| ENTRE 1 – 3 DÍAS   | <input type="checkbox"/> | 1 | ENTRE 30 – 150 DÍAS                                           | <input type="checkbox"/>            | 5 |
| ENTRE 4 – 9 DÍAS   | <input type="checkbox"/> | 2 | MAS DE 150 DÍAS                                               | <input checked="" type="checkbox"/> | 6 |
| ENTRE 10 – 19 DÍAS | <input type="checkbox"/> | 3 | NO HE TOMADO BEBIDAS ALCOHÓLICAS DURANTE LOS ÚLTIMOS 12 MESES | <input type="checkbox"/>            | 7 |
| ENTRE 20 – 29 DÍAS | <input type="checkbox"/> | 4 | NUNCA HE TOMADO BEBIDAS ALCOHÓLICAS                           | <input type="checkbox"/>            | 8 |

También puede darse el caso de que su consumo varíe en determinadas épocas del año:

- **En verano:** si durante el año realiza un consumo de fin de semana, pero los meses de verano (junio, julio y agosto) además bebe 3 días entre semana:
  - Verano: 2 días del fin de semana + 3 días entre semana x 12 semanas (teniendo en cuenta que cada mes tiene 4 semanas) = 5 días x 12 semanas = **60 días.**
  - Resto del año: 2 días (sábado y domingo) x 40 semanas = 2 x 40 = **80 días.**

En total **140 días.**
  
- **En Navidad:** si durante la semana de Navidad el consumo lo hace diario, manteniendo el resto del año un consumo de fin de semana:
  - Navidad: 7 días x 2 semanas = **14 días.**
  - Resto del año: 2 días (sábado y domingo) x 50 semanas = 2 x 50 = **100 días.**

En total **114 días.**

Hay preguntas, como la del ejemplo anterior, que hacen referencia a un periodo concreto. Es muy importante que **esté atento e identifique los distintos periodos** para poder contestar correctamente:

- EN TODA LA VIDA
- ÚLTIMOS 12 MESES
- ÚLTIMOS 30 DÍAS

Si se ha equivocado y quiere corregir una respuesta que ya ha marcado, rodee con un círculo completamente la respuesta incorrecta (X) y marque con una x la respuesta correcta.

**¿Cuántos días tomó Vd. una o más bebidas alcohólicas durante los ÚLTIMOS 12 MESES?**

|                             |          |   |                                                               |   |
|-----------------------------|----------|---|---------------------------------------------------------------|---|
| <b>Respuesta incorrecta</b> |          |   |                                                               |   |
| ENTRE 1- 3 DÍAS             | <b>X</b> | 1 | ENTRE 30 - 150 DÍAS                                           | 5 |
| ENTRE 4 - 9 DÍAS            |          | 2 | MAS DE 150 DÍAS                                               | 6 |
| ENTRE 10 - 19 DÍAS          |          | 3 | NO HE TOMADO BEBIDAS ALCOHÓLICAS DURANTE LOS ÚLTIMOS 12 MESES | 7 |
| ENTRE 20 - 29 DÍAS          | <b>X</b> | 4 | NUNCA HE TOMADO BEBIDAS ALCOHÓLICAS                           | 8 |
| <b>Respuesta correcta</b>   |          |   |                                                               |   |

**Si no entiende bien las instrucciones, por favor coméntelo con el entrevistador/a.**

# ALCOHOL

Marque con una "X" la casilla (  ) correspondiente a su respuesta  
 Recuerde que **sólo ha de marcar una casilla** en cada pregunta

**SE CONSIDERA BEBIDA ALCOHÓLICA CUALQUIER TIPO DE SUSTANCIA QUE CONTENGA ALCOHOL, ENTRE LAS QUE SE INCLUYEN:**

- **VINO, CHAMPÁN, CAVA**
- **CERVEZA, SIDRA** (cañas, claras...)
- **VERMÚ, JEREZ, FINOS**
- **COMBINADOS o CUBATAS** (copas de bebidas alcohólicas de alta graduación mezcladas con refrescos, zumos,... Se incluyen los mojitos)
- **LICORES DE FRUTAS** (pacharán, licores de manzana, pera, melocotón, melón...)
- **LICORES FUERTES o BEBIDAS DESTILADAS** (coñac, brandy, ginebra, ron, whisky, crema de orujo, crema de ron, tequila, carajillo...)

**A1. ¿Ha tomado usted, ALGUNA VEZ, aunque fuera sólo una vez, cualquier clase de bebida alcohólica?**

|                                                |                          |   |
|------------------------------------------------|--------------------------|---|
| SÍ, ALGUNA VEZ HE TOMADO UNA BEBIDA ALCOHÓLICA | <input type="checkbox"/> | 1 |
| NUNCA HE TOMADO UNA BEBIDA ALCOHÓLICA          | <input type="checkbox"/> | 2 |

**A2. ¿Qué EDAD tenía la PRIMERA VEZ que tomó cualquier clase de bebida alcohólica? No incluya sorbos de la bebida de otra persona.**

Si Vd. no puede recordar exactamente qué edad tenía, indique una edad aproximada. Ponga los años que tenía sobre la línea o marque con una "X" la casilla.

ANOTE EDAD DEL PRIMER CONSUMO DE CUALQUIER BEBIDA ALCOHÓLICA: \_\_\_\_\_ AÑOS

|                                       |                          |   |
|---------------------------------------|--------------------------|---|
| NUNCA HE TOMADO UNA BEBIDA ALCOHÓLICA | <input type="checkbox"/> | 1 |
|---------------------------------------|--------------------------|---|

**A3. Ahora piense en los ÚLTIMOS 12 MESES. ¿Cuántos días tomó Vd. una o más bebidas alcohólicas durante los ÚLTIMOS 12 MESES?**

Recuerde el ejemplo que leyó al inicio del cuestionario.

|                    |                          |   |                                                               |                          |   |
|--------------------|--------------------------|---|---------------------------------------------------------------|--------------------------|---|
| ENTRE 1 – 3 DÍAS   | <input type="checkbox"/> | 1 | ENTRE 30 – 150 DÍAS                                           | <input type="checkbox"/> | 5 |
| ENTRE 4 – 9 DÍAS   | <input type="checkbox"/> | 2 | MAS DE 150 DÍAS                                               | <input type="checkbox"/> | 6 |
| ENTRE 10 – 19 DÍAS | <input type="checkbox"/> | 3 | NO HE TOMADO BEBIDAS ALCOHÓLICAS DURANTE LOS ÚLTIMOS 12 MESES | <input type="checkbox"/> | 7 |
| ENTRE 20 – 29 DÍAS | <input type="checkbox"/> | 4 | NUNCA HE TOMADO BEBIDAS ALCOHÓLICAS                           | <input type="checkbox"/> | 8 |

**A4. Durante estos ÚLTIMOS 12 MESES, ¿cuántos días se emborrachó?**

|                    |                          |   |                                                               |                          |   |
|--------------------|--------------------------|---|---------------------------------------------------------------|--------------------------|---|
| ENTRE 1– 3 DÍAS    | <input type="checkbox"/> | 1 | NO HE TOMADO BEBIDAS ALCOHÓLICAS DURANTE LOS ÚLTIMOS 12 MESES | <input type="checkbox"/> | 6 |
| ENTRE 4 – 9 DÍAS   | <input type="checkbox"/> | 2 | NUNCA HE TOMADO BEBIDAS ALCOHÓLICAS                           | <input type="checkbox"/> | 7 |
| ENTRE 10 – 19 DÍAS | <input type="checkbox"/> | 3 | NO ME HE EMBORRACHADO EN LOS ÚLTIMOS 12 MESES                 | <input type="checkbox"/> | 8 |
| ENTRE 20 – 29 DÍAS | <input type="checkbox"/> | 4 | NUNCA ME HE EMBORRACHADO                                      | <input type="checkbox"/> | 9 |
| 30 DÍAS ó MÁS      | <input type="checkbox"/> | 5 |                                                               |                          |   |

**A5. En los ÚLTIMOS 12 MESES, ¿Cuántos días ha bebido lo suficiente para sentir sensación de inestabilidad o dificultad para hablar?**

|                    |                          |   |                                                                                                     |                          |   |
|--------------------|--------------------------|---|-----------------------------------------------------------------------------------------------------|--------------------------|---|
| ENTRE 1 – 3 DÍAS   | <input type="checkbox"/> | 1 | NO HE TOMADO BEBIDAS ALCOHÓLICAS DURANTE LOS ÚLTIMOS 12 MESES                                       | <input type="checkbox"/> | 6 |
| ENTRE 4 – 9 DÍAS   | <input type="checkbox"/> | 2 | NUNCA HE TOMADO BEBIDAS ALCOHÓLICAS                                                                 | <input type="checkbox"/> | 7 |
| ENTRE 10 – 19 DÍAS | <input type="checkbox"/> | 3 | NO HE TENIDO TRAS BEBER SENSACIÓN DE INESTABILIDAD O DIFICULTAD PARA HABLAR EN LOS ÚLTIMOS 12 MESES | <input type="checkbox"/> | 8 |
| ENTRE 20 – 29 DÍAS | <input type="checkbox"/> | 4 | NUNCA HE TENIDO TRAS BEBER SENSACIÓN DE INESTABILIDAD O DIFICULTAD PARA HABLAR                      | <input type="checkbox"/> | 9 |
| 30 DÍAS ó MÁS      | <input type="checkbox"/> | 5 |                                                                                                     |                          |   |

**A6. ¿En los últimos 12 meses, con qué frecuencia ha hecho usted “botellón”?**

|                                                  |                          |   |
|--------------------------------------------------|--------------------------|---|
| 2 ó MÁS DÍAS A LA SEMANA                         | <input type="checkbox"/> | 1 |
| 3 ó 4 DÍAS AL MES                                | <input type="checkbox"/> | 2 |
| 1 ó 2 DÍAS AL MES                                | <input type="checkbox"/> | 3 |
| MENOS DE 1 DÍA AL MES (ENTRE 4 y 11 DÍAS AL AÑO) | <input type="checkbox"/> | 4 |
| DE 1 a 3 DÍAS AL AÑO                             | <input type="checkbox"/> | 5 |
| NO HE HECHO BOTELLÓN EN EL ÚLTIMO AÑO            | <input type="checkbox"/> | 6 |
| NUNCA HE HECHO BOTELLÓN                          | <input type="checkbox"/> | 7 |

**A7. Las personas beben alcohol por distintos motivos. Nos gustaría saber cuáles son para usted los motivos principales para beber. Si piensa en las ocasiones en que ha bebido en los ÚLTIMOS 12 MESES, ya sea cerveza, vino, combinados o licores, ¿Con qué frecuencia ha bebido...**

|                                                                                                | NUNCA                      | ALGUNA VEZ                 | LA MITAD DE LAS VECES      | CASI SIEMPRE               | SIEMPRE                    |
|------------------------------------------------------------------------------------------------|----------------------------|----------------------------|----------------------------|----------------------------|----------------------------|
| PORQUE LE GUSTA CÓMO SE SIENTE DESPUÉS DE BEBER?                                               | <input type="checkbox"/> 1 | <input type="checkbox"/> 2 | <input type="checkbox"/> 3 | <input type="checkbox"/> 4 | <input type="checkbox"/> 5 |
| PORQUE ES DIVERTIDO O PORQUE ANIMA LAS FIESTAS Y CELEBRACIONES?                                | <input type="checkbox"/> 1 | <input type="checkbox"/> 2 | <input type="checkbox"/> 3 | <input type="checkbox"/> 4 | <input type="checkbox"/> 5 |
| SÓLO PARA EMBORRACHARSE?                                                                       | <input type="checkbox"/> 1 | <input type="checkbox"/> 2 | <input type="checkbox"/> 3 | <input type="checkbox"/> 4 | <input type="checkbox"/> 5 |
| PARA ENCAJAR EN UN GRUPO QUE LE GUSTA O PARA NO SENTIRSE EXCLUIDO (EN RELACIÓN CON LOS DEMÁS)? | <input type="checkbox"/> 1 | <input type="checkbox"/> 2 | <input type="checkbox"/> 3 | <input type="checkbox"/> 4 | <input type="checkbox"/> 5 |
| PORQUE LE AYUDA CUANDO SE SIENTE DEPRIMIDO O CUANDO NECESITA OLVIDARSE DE TODO?                | <input type="checkbox"/> 1 | <input type="checkbox"/> 2 | <input type="checkbox"/> 3 | <input type="checkbox"/> 4 | <input type="checkbox"/> 5 |
| PORQUE CREE QUE ES SALUDABLE O PORQUE FORMA PARTE DE UNA ALIMENTACIÓN EQUILIBRADA?             | <input type="checkbox"/> 1 | <input type="checkbox"/> 2 | <input type="checkbox"/> 3 | <input type="checkbox"/> 4 | <input type="checkbox"/> 5 |

|                                                            |                          |   |
|------------------------------------------------------------|--------------------------|---|
| NO HE TOMADO UNA BEBIDA ALCOHÓLICA EN LOS ÚLTIMOS 12 MESES | <input type="checkbox"/> | 9 |
| NUNCA HE TOMADO UNA BEBIDA ALCOHÓLICA                      | <input type="checkbox"/> | 0 |

**Las siguientes preguntas se refieren solamente a los ÚLTIMOS 30 DÍAS**

**A8. Centrándose en los ÚLTIMOS 30 DÍAS, ¿cuántos días tomó Vd. una o más bebidas alcohólicas?**

|                    |                          |   |                                                              |                          |   |
|--------------------|--------------------------|---|--------------------------------------------------------------|--------------------------|---|
| ENTRE 1 – 3 DÍAS   | <input type="checkbox"/> | 1 | 30 DÍAS                                                      | <input type="checkbox"/> | 5 |
| ENTRE 4 – 9 DÍAS   | <input type="checkbox"/> | 2 | NO HE TOMADO BEBIDAS ALCOHÓLICAS DURANTE LOS ÚLTIMOS 30 DÍAS | <input type="checkbox"/> | 6 |
| ENTRE 10 – 19 DÍAS | <input type="checkbox"/> | 3 | NUNCA HE TOMADO BEBIDAS ALCOHÓLICAS                          | <input type="checkbox"/> | 7 |
| ENTRE 20 – 29 DÍAS | <input type="checkbox"/> | 4 |                                                              |                          |   |

**A9. Durante los ÚLTIMOS 30 DÍAS, ¿cuántos días se emborrachó?**

|                    |                          |   |                                                              |                          |   |
|--------------------|--------------------------|---|--------------------------------------------------------------|--------------------------|---|
| ENTRE 1 – 3 DÍAS   | <input type="checkbox"/> | 1 | NO HE TOMADO BEBIDAS ALCOHÓLICAS DURANTE LOS ÚLTIMOS 30 DÍAS | <input type="checkbox"/> | 6 |
| ENTRE 4 – 9 DÍAS   | <input type="checkbox"/> | 2 | NUNCA HE TOMADO BEBIDAS ALCOHÓLICAS                          | <input type="checkbox"/> | 7 |
| ENTRE 10 – 19 DÍAS | <input type="checkbox"/> | 3 | NO ME HE EMBORRACHADO EN LOS ÚLTIMOS 30 DÍAS                 | <input type="checkbox"/> | 8 |
| ENTRE 20 – 29 DÍAS | <input type="checkbox"/> | 4 | NUNCA ME HE EMBORRACHADO                                     | <input type="checkbox"/> | 9 |
| 30 DÍAS            | <input type="checkbox"/> | 5 |                                                              |                          |   |

**Durante los ÚLTIMOS 30 DÍAS, ¿cuántos días ha tomado en la misma ocasión 5 ó más bebidas alcohólicas (si usted es hombre) o 4 ó más bebidas alcohólicas (si usted es mujer)? Entendiendo por "ocasión" cuando se toman varias bebidas seguidas o en un plazo de un par de horas. No excluya las bebidas tomadas durante las comidas. Ponga sobre la línea el número de días.**

**A10. HOMBRE:**

ANOTE EL **Nº DE DÍAS** EN QUE HA TOMADO 5 Ó MÁS BEBIDAS EN LA MISMA OCASIÓN: \_\_\_\_\_ días

|                                                                                          |                          |   |
|------------------------------------------------------------------------------------------|--------------------------|---|
| NO HE TOMADO 5 Ó MÁS BEBIDAS ALCOHÓLICAS EN LA MISMA OCASIÓN DURANTE LOS ÚLTIMOS 30 DÍAS | <input type="checkbox"/> | 1 |
| NUNCA HE TOMADO UNA BEBIDA ALCOHÓLICA                                                    | <input type="checkbox"/> | 2 |
| NO HE TOMADO BEBIDAS ALCOHÓLICAS DURANTE LOS ÚLTIMOS 30 DÍAS                             | <input type="checkbox"/> | 3 |

**A11. MUJER:**

ANOTE EL **Nº DE DÍAS** EN QUE HA TOMADO 4 Ó MÁS BEBIDAS EN LA MISMA OCASIÓN: \_\_\_\_\_ días

|                                                                                          |                          |   |
|------------------------------------------------------------------------------------------|--------------------------|---|
| NO HE TOMADO 4 Ó MÁS BEBIDAS ALCOHÓLICAS EN LA MISMA OCASIÓN DURANTE LOS ÚLTIMOS 30 DÍAS | <input type="checkbox"/> | 1 |
| NUNCA HE TOMADO UNA BEBIDA ALCOHÓLICA                                                    | <input type="checkbox"/> | 2 |
| NO HE TOMADO BEBIDAS ALCOHÓLICAS DURANTE LOS ÚLTIMOS 30 DÍAS                             | <input type="checkbox"/> | 3 |

**Las siguientes preguntas se refieren solamente a los ÚLTIMOS 7 DÍAS**

**A12. En los ÚLTIMOS 7 DÍAS, ¿Cuántos días ha consumido usted alguna bebida alcohólica?**

Marque de 0 a 7 el número de días que ha consumido bebidas alcohólicas en los últimos 7 días siendo **0 días ningún día** de los últimos 7 días y **7 días todos los días** durante los últimos 7 días.

|                                                                                | 0 días                                | 1 día                                 | 2 días                                | 3 días                                | 4 días                                | 5 días                                | 6 días                                | 7 días                                |
|--------------------------------------------------------------------------------|---------------------------------------|---------------------------------------|---------------------------------------|---------------------------------------|---------------------------------------|---------------------------------------|---------------------------------------|---------------------------------------|
| NÚMERO DE DÍAS QUE HA CONSUMIDO ALGUNA BEBIDA ALCOHÓLICA EN LOS ÚLTIMOS 7 DÍAS | <input type="checkbox"/> <sub>0</sub> | <input type="checkbox"/> <sub>1</sub> | <input type="checkbox"/> <sub>2</sub> | <input type="checkbox"/> <sub>3</sub> | <input type="checkbox"/> <sub>4</sub> | <input type="checkbox"/> <sub>5</sub> | <input type="checkbox"/> <sub>6</sub> | <input type="checkbox"/> <sub>7</sub> |

**A13. En los ÚLTIMOS 7 DÍAS ¿Cuántos vasos o copas de las siguientes bebidas alcohólicas ha consumido en total?** Anote el número de vasos o copas de estas bebidas que ha consumido en total en los últimos 7 días, si no ha consumido en los últimos 7 días marque 0.

|                                                                      |                                                                                    | Nº total de bebidas alcohólicas consumidas EN LOS ÚLTIMOS 7 DÍAS |
|----------------------------------------------------------------------|------------------------------------------------------------------------------------|------------------------------------------------------------------|
| Nº de vasos o copas de <b>VINO/CHAMPÁN o CAVA</b>                    |   | _ _                                                              |
| Nº de vasos, cañas o quintos de <b>CERVEZA o SIDRA</b>               |   | _ _                                                              |
| Nº de vasos o copas de <b>VERMÚ, JEREZ o FINO</b>                    |   | _ _                                                              |
| Nº de vasos de <b>COMBINADOS o CUBATAS</b>                           |   | _ _                                                              |
| Nº de copas de <b>LICORES DE FRUTAS SOLOS (PACHARÁN, MANZANA)</b>    |   | _ _                                                              |
| Nº de copas de <b>LICORES FUERTES SOLOS (COÑAC, GINEBRA, WHISKY)</b> |  | _ _                                                              |

|                                                             |                            |
|-------------------------------------------------------------|----------------------------|
| NO HE TOMADO BEBIDAS ALCOHÓLICAS DURANTE LOS ÚLTIMOS 7 DÍAS | <input type="checkbox"/> 1 |
| NUNCA HE TOMADO UNA BEBIDA ALCOHÓLICA EN MI VIDA            | <input type="checkbox"/> 2 |

**Las siguientes preguntas se refieren al consumo de bebidas energéticas**

**A14. ¿Ha tomado en los ÚLTIMOS 30 DÍAS bebidas energéticas (Red Bull, Burn, Monster...)?** Conteste "No" si lo único que hizo fue dar un sorbo o probar de la bebida de otra persona.

SÍ  1  
 NO  2

**A15. ¿Ha tomado en los ÚLTIMOS 30 DÍAS bebidas energéticas (Red Bull, Burn, Monster...) mezcladas con bebidas alcohólicas?** Conteste "No" si lo único que hizo fue dar un sorbo o probar de la bebida de otra persona.

SÍ  1  
 NO  2

**Las siguientes preguntas se refieren al consumo de bebidas alcohólicas en general**

**A16. Conteste a esta pregunta SÓLO SI ES USTED UNA MUJER. Si ha estado usted EMBARAZADA o está actualmente embarazada, ¿Ha consumido o consume cualquier bebida alcohólica durante el embarazo?**

SÍ  1  
 NO  2  
 No he estado embarazada NUNCA  9

**A17. A continuación le indicamos algunas afirmaciones sobre actitudes ante las POLÍTICAS EN MATERIA DE ALCOHOL. Para cada afirmación, indique si está de acuerdo o en desacuerdo:**

|                                                                                                                                                          | De acuerdo                            | En desacuerdo                         |
|----------------------------------------------------------------------------------------------------------------------------------------------------------|---------------------------------------|---------------------------------------|
| El alcohol es un producto como cualquier otro y no necesita <b>ninguna restricción</b> especial                                                          | <input type="checkbox"/> <sub>1</sub> | <input type="checkbox"/> <sub>2</sub> |
| Las <b>personas adultas</b> son lo suficientemente responsables para <b>protegerse a sí mismas</b> de los daños relacionados con el consumo de alcohol   | <input type="checkbox"/> <sub>1</sub> | <input type="checkbox"/> <sub>2</sub> |
| Los <b>poderes públicos</b> tienen la responsabilidad de <b>proteger a las personas</b> de los daños relacionados con su consumo de alcohol              | <input type="checkbox"/> <sub>1</sub> | <input type="checkbox"/> <sub>2</sub> |
| La <b>educación y la información</b> en materia de alcohol deberían ser las políticas más importantes para reducir los daños relacionados con el alcohol | <input type="checkbox"/> <sub>1</sub> | <input type="checkbox"/> <sub>2</sub> |
| Se debería <b>prohibir la publicidad</b> de bebidas alcohólicas                                                                                          | <input type="checkbox"/> <sub>1</sub> | <input type="checkbox"/> <sub>2</sub> |
| En los envases de las bebidas alcohólicas se deberían mostrar <b>advertencias sobre los daños</b> relacionados con el alcohol                            | <input type="checkbox"/> <sub>1</sub> | <input type="checkbox"/> <sub>2</sub> |
| Los <b>padres o tutores legales</b> , y no las autoridades legales, deben decidir a qué <b>edad se permite a los hijos consumir</b> bebidas alcohólicas  | <input type="checkbox"/> <sub>1</sub> | <input type="checkbox"/> <sub>2</sub> |
| El <b>patrocinio de deportistas</b> , equipos deportivos o eventos deportivos por parte de la industria del alcohol debieran estar prohibidos por ley    | <input type="checkbox"/> <sub>1</sub> | <input type="checkbox"/> <sub>2</sub> |

Ahora vamos a volver a preguntarle algunas cosas sobre el **CONSUMO DE BEBIDAS ALCOHÓLICAS EN LOS 12 ÚLTIMOS MESES**.

**Muy importante:**

- **SI NO HA CONSUMIDO ALCOHOL EN LOS ÚLTIMOS 12 MESES**, no conteste este bloque y pase a la pregunta T1 (Tabaco)

- **SI HA CONSUMIDO ALCOHOL EN LOS ÚLTIMOS 12 MESES**, **DEBE CONTESTAR TODAS LAS PREGUNTAS** porque forman parte de un cuestionario y deben analizarse conjuntamente.

**AU1. ¿Con qué frecuencia consume bebidas alcohólicas?**

|                           |                          |   |
|---------------------------|--------------------------|---|
| Nunca                     | <input type="checkbox"/> | 1 |
| Una o menos veces al mes  | <input type="checkbox"/> | 2 |
| 2 a 4 veces al mes        | <input type="checkbox"/> | 3 |
| 2 ó 3 veces a la semana   | <input type="checkbox"/> | 4 |
| 4 o más veces a la semana | <input type="checkbox"/> | 5 |

**AU2. ¿Cuántas bebidas alcohólicas consume normalmente cuando bebe?**

|          |                          |   |
|----------|--------------------------|---|
| 1 ó 2    | <input type="checkbox"/> | 1 |
| 3 ó 4    | <input type="checkbox"/> | 2 |
| 5 ó 6    | <input type="checkbox"/> | 3 |
| 7 a 9    | <input type="checkbox"/> | 4 |
| 10 o más | <input type="checkbox"/> | 5 |



**AU3. ¿Con qué frecuencia se toma 6 o más bebidas alcohólicas en un solo día?**

|                          |                          |   |
|--------------------------|--------------------------|---|
| Nunca                    | <input type="checkbox"/> | 1 |
| Menos de una vez / mes   | <input type="checkbox"/> | 2 |
| Mensualmente             | <input type="checkbox"/> | 3 |
| Semanalmente             | <input type="checkbox"/> | 4 |
| A diario o casi a diario | <input type="checkbox"/> | 5 |

**AU4. ¿Con qué frecuencia, en el curso del último año, ha sido incapaz de parar de beber una vez que había empezado?**

|                          |                          |   |
|--------------------------|--------------------------|---|
| Nunca                    | <input type="checkbox"/> | 1 |
| Menos de una vez / mes   | <input type="checkbox"/> | 2 |
| Mensualmente             | <input type="checkbox"/> | 3 |
| Semanalmente             | <input type="checkbox"/> | 4 |
| A diario o casi a diario | <input type="checkbox"/> | 5 |

**AU5. ¿Con qué frecuencia, en el curso del último año, no pudo atender sus obligaciones porque había bebido?**

|                          |                          |   |
|--------------------------|--------------------------|---|
| Nunca                    | <input type="checkbox"/> | 1 |
| Menos de una vez / mes   | <input type="checkbox"/> | 2 |
| Mensualmente             | <input type="checkbox"/> | 3 |
| Semanalmente             | <input type="checkbox"/> | 4 |
| A diario o casi a diario | <input type="checkbox"/> | 5 |

**AU6. ¿Con qué frecuencia, en el curso del último año, ha necesitado beber en ayunas para recuperarse después de haber bebido mucho el día anterior?**

|                          |                          |   |
|--------------------------|--------------------------|---|
| Nunca                    | <input type="checkbox"/> | 1 |
| Menos de una vez / mes   | <input type="checkbox"/> | 2 |
| Mensualmente             | <input type="checkbox"/> | 3 |
| Semanalmente             | <input type="checkbox"/> | 4 |
| A diario o casi a diario | <input type="checkbox"/> | 5 |

**AU7. ¿Con qué frecuencia, en el curso del último año, ha tenido remordimientos o sentimientos de culpa después de haber bebido?**

|                          |                          |   |
|--------------------------|--------------------------|---|
| Nunca                    | <input type="checkbox"/> | 1 |
| Menos de una vez / mes   | <input type="checkbox"/> | 2 |
| Mensualmente             | <input type="checkbox"/> | 3 |
| Semanalmente             | <input type="checkbox"/> | 4 |
| A diario o casi a diario | <input type="checkbox"/> | 5 |

**AU8. ¿Con qué frecuencia, en el curso del último año, no ha podido recordar lo que sucedió la noche anterior porque había estado bebiendo?**

|                          |                          |   |
|--------------------------|--------------------------|---|
| Nunca                    | <input type="checkbox"/> | 1 |
| Menos de una vez / mes   | <input type="checkbox"/> | 2 |
| Mensualmente             | <input type="checkbox"/> | 3 |
| Semanalmente             | <input type="checkbox"/> | 4 |
| A diario o casi a diario | <input type="checkbox"/> | 5 |

**AU9. Usted, o alguna otra persona, ¿ha resultado herida porque usted había bebido?**

|                                        |                          |   |
|----------------------------------------|--------------------------|---|
| No                                     | <input type="checkbox"/> | 1 |
| Sí, pero no en el curso del último año | <input type="checkbox"/> | 2 |
| Sí, en el último año                   | <input type="checkbox"/> | 3 |

**AU10. ¿Algún familiar, amigo, médico o profesional sanitario ha mostrado preocupación por su consumo de alcohol, o le ha sugerido que deje de beber?**

|                                        |                          |   |
|----------------------------------------|--------------------------|---|
| No                                     | <input type="checkbox"/> | 1 |
| Sí, pero no en el curso del último año | <input type="checkbox"/> | 2 |
| Sí, en el último año                   | <input type="checkbox"/> | 3 |

**VD. HA TERMINADO LAS PREGUNTAS ACERCA DEL ALCOHOL. GRACIAS.  
POR FAVOR, AHORA CONTINUE LEYENDO Y RESPONDIENDO POR VD. MISMO LAS PREGUNTAS QUE SIGUEN Y SI TIENE  
ALGUNA DUDA PUEDE CONSULTAR AL ENTREVISTADOR/A EN CUALQUIER MOMENTO**

## TABACO

Marque con una "X" la casilla () correspondiente a su respuesta  
 Recuerde que **sólo ha de marcar una casilla** en cada pregunta

**T1. Indique si usted ha consumido UN CIGARRILLO U OTRO TIPO DE TABACO, aunque fuera sólo una o dos caladas ALGUNA VEZ EN LA VIDA, y/o en los ÚLTIMOS 12 MESES, y/o en los ÚLTIMOS 30 DÍAS y/o A DIARIO EN LOS ÚLTIMOS 30 DÍAS. Si ha consumido anote en el recuadro correspondiente la EDAD en que lo consumió por PRIMERA VEZ.**

|                                                                                     | ¿Ha consumido ALGUNA VEZ EN LA VIDA?  |                                       | ¿Ha consumido alguna vez en los ÚLTIMOS 12 MESES? |                                       | ¿Ha consumido alguna vez en los ÚLTIMOS 30 DÍAS? |                                       | ¿Ha consumido alguna vez A DIARIO en los ÚLTIMOS 30 DÍAS? |                                       | EDAD en que consumió por <u>primera vez en su vida</u> |
|-------------------------------------------------------------------------------------|---------------------------------------|---------------------------------------|---------------------------------------------------|---------------------------------------|--------------------------------------------------|---------------------------------------|-----------------------------------------------------------|---------------------------------------|--------------------------------------------------------|
|                                                                                     | No                                    | Sí                                    | No                                                | Sí                                    | No                                               | Sí                                    | No                                                        | Sí                                    |                                                        |
| <b><u>CIGARRILLO U OTRO TIPO DE TABACO</u>, aunque fuera sólo una o dos caladas</b> | <input type="checkbox"/> <sub>1</sub> | <input type="checkbox"/> <sub>2</sub> | <input type="checkbox"/> <sub>1</sub>             | <input type="checkbox"/> <sub>2</sub> | <input type="checkbox"/> <sub>1</sub>            | <input type="checkbox"/> <sub>2</sub> | <input type="checkbox"/> <sub>1</sub>                     | <input type="checkbox"/> <sub>2</sub> |                                                        |

**T2. ¿Cuándo ha sido la PRIMERA VEZ que ha fumado, un cigarrillo u otro tipo de tabaco?**

|                                                     |                            |
|-----------------------------------------------------|----------------------------|
| HACE UN AÑO O MENOS                                 | <input type="checkbox"/> 1 |
| HACE MÁS DE 1 AÑO                                   | <input type="checkbox"/> 2 |
| NUNCA HE FUMADO UN CIGARRILLO U OTRO TIPO DE TABACO | <input type="checkbox"/> 3 |

**T3. Durante los ÚLTIMOS 30 DÍAS, por término medio, ¿qué número de cigarrillos o puros solía fumar cada día que fumaba?** Anote el número medio o marque con una "X" el recuadro correspondiente.

|                                          |                                    |
|------------------------------------------|------------------------------------|
| <b>CIGARRILLOS</b><br>ANOTE EL N°: _____ | <b>PUROS</b><br>ANOTE EL N°: _____ |
|------------------------------------------|------------------------------------|

|                                                          |                            |
|----------------------------------------------------------|----------------------------|
| NO HE FUMADO UN CIGARRILLO o PURO EN LOS ÚLTIMOS 30 DÍAS | <input type="checkbox"/> 1 |
| NUNCA HE FUMADO UN CIGARRILLO O PURO                     | <input type="checkbox"/> 2 |

**T4. Durante los ÚLTIMOS 30 DÍAS, si ha fumado cigarrillos, ¿qué tipo de cigarrillos ha fumado?**

|                                     |                            |
|-------------------------------------|----------------------------|
| CIGARRILLOS DE CAJETILLA            | <input type="checkbox"/> 1 |
| TABACO DE LIAR                      | <input type="checkbox"/> 2 |
| DE LOS 2 TIPOS                      | <input type="checkbox"/> 3 |
| NO HE FUMADO EN LOS ÚLTIMOS 30 DÍAS | <input type="checkbox"/> 4 |
| NUNCA HE FUMADO EN MI VIDA          | <input type="checkbox"/> 5 |

**T5. ¿Ha habido, alguna vez, un período en su vida en que Vd. haya fumado tabaco TODOS LOS DÍAS?**

|                                                     |                            |
|-----------------------------------------------------|----------------------------|
| SÍ, ALGUNA VEZ HE FUMADO TODOS LOS DÍAS             | <input type="checkbox"/> 1 |
| NO HE FUMADO EN NINGUNA OCASIÓN TODOS LOS DÍAS      | <input type="checkbox"/> 2 |
| NUNCA HE FUMADO UN CIGARRILLO U OTRO TIPO DE TABACO | <input type="checkbox"/> 3 |

**T6. ¿Qué edad tenía cuando comenzó a fumar tabaco TODOS LOS DÍAS?**  
Ponga sobre la línea los años que tenía o marque el recuadro correspondiente.

ANOTE LA EDAD: \_\_\_\_\_ AÑOS

|                                |                          |   |
|--------------------------------|--------------------------|---|
| NUNCA HE FUMADO TODOS LOS DÍAS | <input type="checkbox"/> | 1 |
| NUNCA HE FUMADO EN MI VIDA     | <input type="checkbox"/> | 2 |

**T7. ¿Durante cuántos años fumó TODOS LOS DÍAS?**  
Ponga sobre la línea los años o marque el recuadro correspondiente.

ANOTE EL N° DE AÑOS: \_\_\_\_\_ AÑOS

|                                                                |                          |   |
|----------------------------------------------------------------|--------------------------|---|
| HE FUMADO TODOS LOS DÍAS, PERO DURANTE MENOS DE 1 AÑO COMPLETO | <input type="checkbox"/> | 1 |
| HE FUMADO ALGUNA VEZ, PERO NUNCA TODOS LOS DÍAS                | <input type="checkbox"/> | 2 |
| NUNCA HE FUMADO EN MI VIDA                                     | <input type="checkbox"/> | 3 |

**T8. ¿Cuánto tiempo ha pasado desde la última vez que Vd. fumó un cigarrillo u otro tipo de tabaco?**

|                                    |                          |   |                                                     |                          |   |
|------------------------------------|--------------------------|---|-----------------------------------------------------|--------------------------|---|
| MENOS DE 30 DÍAS                   | <input type="checkbox"/> | 1 | MÁS DE 12 MESES                                     | <input type="checkbox"/> | 3 |
| MÁS DE UN MES PERO MENOS DE UN AÑO | <input type="checkbox"/> | 2 | NUNCA HE FUMADO UN CIGARRILLO U OTRO TIPO DE TABACO | <input type="checkbox"/> | 4 |

**T9. ¿Se ha planteado alguna vez dejar de fumar?**

|                              |                          |   |
|------------------------------|--------------------------|---|
| ¡SÍ Y LO HE INTENTADO        | <input type="checkbox"/> | 1 |
| ¡SÍ, PERO NO LO HE INTENTADO | <input type="checkbox"/> | 2 |
| NO ME LO HE PLANTEADO        | <input type="checkbox"/> | 3 |
| NO FUMO                      | <input type="checkbox"/> | 4 |

**Las siguientes preguntas se refieren al consumo de cigarrillos electrónicos**

**CE1. Indique si usted ha consumido CIGARRILLOS ELECTRÓNICOS (vapear) ALGUNA VEZ EN LA VIDA, y/o en los ÚLTIMOS 12 MESES, y/o en los ÚLTIMOS 30 DÍAS y/o A DIARIO EN LOS ÚLTIMOS 30 DÍAS. Si ha consumido anote en el recuadro correspondiente la EDAD en que lo consumió por PRIMERA VEZ.**

|                                          | ¿Ha consumido ALGUNA VEZ EN LA VIDA? |                            | ¿Ha consumido alguna vez en los ÚLTIMOS 12 MESES? |                            | ¿Ha consumido alguna vez en los ÚLTIMOS 30 DÍAS? |                            | ¿Ha consumido alguna vez A DIARIO en los ÚLTIMOS 30 DÍAS? |                            | EDAD en que consumió <u>por primera vez en su vida</u> |
|------------------------------------------|--------------------------------------|----------------------------|---------------------------------------------------|----------------------------|--------------------------------------------------|----------------------------|-----------------------------------------------------------|----------------------------|--------------------------------------------------------|
|                                          | No                                   | Sí                         | No                                                | Sí                         | No                                               | Sí                         | No                                                        | Sí                         |                                                        |
| <b>CIGARRILLOS ELECTRÓNICOS (vapear)</b> | <input type="checkbox"/> 1           | <input type="checkbox"/> 2 | <input type="checkbox"/> 1                        | <input type="checkbox"/> 2 | <input type="checkbox"/> 1                       | <input type="checkbox"/> 2 | <input type="checkbox"/> 1                                | <input type="checkbox"/> 2 |                                                        |

**CE2. Si ha fumado CIGARRILLOS ELECTRÓNICOS (vapear), ¿Qué tipo de cartucho o líquido emplea para recargar su cigarrillo electrónico?**

|                                                                        |                          |   |
|------------------------------------------------------------------------|--------------------------|---|
| CARTUCHOS O LÍQUIDOS PARA CIGARRILLOS ELECTRÓNICOS <b>CON</b> NICOTINA | <input type="checkbox"/> | 1 |
| CARTUCHOS O LÍQUIDOS PARA CIGARRILLOS ELECTRÓNICOS <b>SIN</b> NICOTINA | <input type="checkbox"/> | 2 |
| DE LOS 2 TIPOS                                                         | <input type="checkbox"/> | 3 |
| NO HE FUMADO CIGARRILLOS ELECTRÓNICOS NUNCA                            | <input type="checkbox"/> | 4 |

**CE3. Si ha fumado CIGARRILLOS ELECTRÓNICOS (vapear), ¿Utiliza los CIGARRILLOS ELECTRÓNICOS (vapear) como sustituto del tabaco, para reducir su consumo o dejar de fumar?**

|                                             |                          |   |
|---------------------------------------------|--------------------------|---|
| SÍ                                          | <input type="checkbox"/> | 1 |
| NO                                          | <input type="checkbox"/> | 2 |
| NO HE FUMADO CIGARRILLOS ELECTRÓNICOS NUNCA | <input type="checkbox"/> | 3 |

**VD. HA TERMINADO LAS PREGUNTAS ACERCA DEL TABACO. GRACIAS.  
POR FAVOR, AHORA CONTINUE LEYENDO Y RESPONDIENDO POR VD. MISMO LAS PREGUNTAS QUE SIGUEN Y SI TIENE  
ALGUNA DUDA PUEDE CONSULTAR AL ENTREVISTADOR/A EN CUALQUIER MOMENTO**

**TRANQUILIZANTES / SEDANTES**  
 [medicamentos para calmar los nervios o la ansiedad]  
**Y SOMNÍFEROS**  
 [medicamentos para dormir]

**INCLUYA:** Lexafín, ofidal, noctamid, frankimazin, rohipnol, tranxilium, diacepam, valium, stilnox, zolpidem, hipnóticos, benzos, benzodiazepinas, barbitúricos, etc.

**NO INCLUYA:** valeriana, pasiflora, dormidina, melatonina.

TS1. Indique si usted ha consumido **TRANQUILIZANTES, SEDANTES y/o SOMNIFEROS** (medicamentos para calmar los nervios o la ansiedad o medicamentos para dormir) **ALGUNA VEZ EN LA VIDA**, y/o en los **ÚLTIMOS 12 MESES**, y/o en los **ÚLTIMOS 30 DÍAS** y/o **A DIARIO EN LOS ÚLTIMOS 30 DÍAS**. Si ha consumido anote en el recuadro correspondiente la **EDAD** en que los consumió por **PRIMERA VEZ**.

|                                                                                                                                    | ¿Ha consumido ALGUNA VEZ EN LA VIDA?  |                                       | ¿Ha consumido alguna vez en los ÚLTIMOS 12 MESES? |                                       | ¿Ha consumido alguna vez en los ÚLTIMOS 30 DÍAS? |                                       | ¿Ha consumido alguna vez A DIARIO en los ÚLTIMOS 30 DÍAS? |                                       | EDAD en que consumió <u>por primera vez en su vida</u> |
|------------------------------------------------------------------------------------------------------------------------------------|---------------------------------------|---------------------------------------|---------------------------------------------------|---------------------------------------|--------------------------------------------------|---------------------------------------|-----------------------------------------------------------|---------------------------------------|--------------------------------------------------------|
|                                                                                                                                    | No                                    | Sí                                    | No                                                | Sí                                    | No                                               | Sí                                    | No                                                        | Sí                                    |                                                        |
| <b>TRANQUILIZANTES, SEDANTES y/o SOMNIFEROS</b><br>(medicamentos para calmar los nervios o la ansiedad o medicamentos para dormir) | <input type="checkbox"/> <sub>1</sub> | <input type="checkbox"/> <sub>2</sub> | <input type="checkbox"/> <sub>1</sub>             | <input type="checkbox"/> <sub>2</sub> | <input type="checkbox"/> <sub>1</sub>            | <input type="checkbox"/> <sub>2</sub> | <input type="checkbox"/> <sub>1</sub>                     | <input type="checkbox"/> <sub>2</sub> |                                                        |

TS2. ¿Cuándo ha sido la **PRIMERA VEZ** que ha consumido **TRANQUILIZANTES, SEDANTES y/o SOMNIFEROS** (medicamentos para calmar los nervios o la ansiedad o medicamentos para dormir)?

|                                                             |                            |
|-------------------------------------------------------------|----------------------------|
| HACE UN AÑO O MENOS                                         | <input type="checkbox"/> 1 |
| HACE MÁS DE 1 AÑO                                           | <input type="checkbox"/> 2 |
| NUNCA HE CONSUMIDO TRANQUILIZANTES, SEDANTES y/o SOMNÍFEROS | <input type="checkbox"/> 3 |

**TRANQUILIZANTES/SEDANTES**  
**SIN RECETA O PARA USO NO MÉDICO**  
 [medicamentos para calmar los nervios o la ansiedad]  
**Y SOMNÍFEROS SIN RECETA O PARA USO NO MÉDICO**  
 [medicamentos para dormir]

A continuación las siguientes preguntas se refieren a los mismos medicamentos cuando se han obtenido **SIN RECETA MÉDICA O PARA USO NO MÉDICO** es decir:

- El médico se lo recetó a usted en alguna ocasión pero lo ha seguido tomando sin control por su médico, en mayor cantidad o durante más tiempo que lo que le indicó su médico.
- El médico se lo ha recetado a otra persona de la familia y Vd. los toma de vez en cuando
- Los ha conseguido por otros medios distintos a la receta médica

Marque con una "X" la casilla () correspondiente a su respuesta  
 Recuerde que **sólo ha de marcar una casilla** en cada pregunta.

**TS3. Indique si usted ha consumido TRANQUILIZANTES, SEDANTES y/o SOMNIFEROS SIN RECETA O PARA USO NO MÉDICO (medicamentos para calmar los nervios o la ansiedad o medicamentos para dormir) ALGUNA VEZ EN LA VIDA, y/o en los ÚLTIMOS 12 MESES, y/o en los ÚLTIMOS 30 DÍAS y/o A DIARIO EN LOS ÚLTIMOS 30 DÍAS. Si ha consumido anote en el recuadro correspondiente la EDAD en que la consumió por PRIMERA VEZ.**

|                                                                                                                                                                    | ¿Ha consumido ALGUNA VEZ EN LA VIDA?  |                                       | ¿Ha consumido alguna vez en los ÚLTIMOS 12 MESES? |                                       | ¿Ha consumido alguna vez en los ÚLTIMOS 30 DÍAS? |                                       | ¿Ha consumido alguna vez A DIARIO en los ÚLTIMOS 30 DÍAS? |                                       | EDAD en que consumió <u>por primera vez en su vida</u> |
|--------------------------------------------------------------------------------------------------------------------------------------------------------------------|---------------------------------------|---------------------------------------|---------------------------------------------------|---------------------------------------|--------------------------------------------------|---------------------------------------|-----------------------------------------------------------|---------------------------------------|--------------------------------------------------------|
|                                                                                                                                                                    | No                                    | Sí                                    | No                                                | Sí                                    | No                                               | Sí                                    | No                                                        | Sí                                    |                                                        |
| <b>TRANQUILIZANTES, SEDANTES y/o SOMNIFEROS SIN RECETA O PARA USO NO MÉDICO</b><br>(medicamentos para calmar los nervios o la ansiedad o medicamentos para dormir) | <input type="checkbox"/> <sub>1</sub> | <input type="checkbox"/> <sub>2</sub> | <input type="checkbox"/> <sub>1</sub>             | <input type="checkbox"/> <sub>2</sub> | <input type="checkbox"/> <sub>1</sub>            | <input type="checkbox"/> <sub>2</sub> | <input type="checkbox"/> <sub>1</sub>                     | <input type="checkbox"/> <sub>2</sub> |                                                        |

**TS4. En los ÚLTIMOS 12 MESES, ¿Ha consumido TRANQUILIZANTES, SEDANTES y/o SOMNIFEROS SIN RECETA O PARA USO NO MÉDICO (medicamentos para calmar los nervios o la ansiedad o medicamentos para dormir) en la misma ocasión junto con...?**

Entendiendo por "ocasión" en un plazo de un par de horas

|                                                                         | SÍ                                    | NO                                    |
|-------------------------------------------------------------------------|---------------------------------------|---------------------------------------|
| CON ALCOHOL?                                                            | <input type="checkbox"/> <sub>1</sub> | <input type="checkbox"/> <sub>2</sub> |
| CON DROGAS ILEGALES (CANNABIS, COCAÍNA, HEROÍNA...)?                    | <input type="checkbox"/> <sub>1</sub> | <input type="checkbox"/> <sub>2</sub> |
| CON ALCOHOL Y DROGAS ILEGALES (CANNABIS, COCAÍNA, HEROÍNA...) A LA VEZ? | <input type="checkbox"/> <sub>1</sub> | <input type="checkbox"/> <sub>2</sub> |

|                                                                                                                      |                          |   |
|----------------------------------------------------------------------------------------------------------------------|--------------------------|---|
| <b>NO HE TOMADO TRANQUILIZANTES, SEDANTES y/o SOMNIFEROS SIN RECETA O PARA USO NO MÉDICO EN LOS ÚLTIMOS 12 MESES</b> | <input type="checkbox"/> | 9 |
| <b>NUNCA HE TOMADO TRANQUILIZANTES, SEDANTES y/o SOMNIFEROS SIN RECETA O PARA USO NO MÉDICO</b>                      | <input type="checkbox"/> | 0 |

**TS5. Piense en la última vez que tomó TRANQUILIZANTES, SEDANTES y/o SOMNIFEROS SIN RECETA O PARA USO NO MÉDICO (medicamentos para calmar los nervios o la ansiedad o medicamentos para dormir): ¿Cuáles fueron las razones de su consumo?**

Puede marcar varias opciones

|                                                                                                      |                          |   |
|------------------------------------------------------------------------------------------------------|--------------------------|---|
| PARA EXPERIMENTAR O PROBAR LO QUE <b>SE SENTÍA</b> TOMANDO ESE MEDICAMENTO                           | <input type="checkbox"/> | 1 |
| PARA <b>COLOCARME</b>                                                                                | <input type="checkbox"/> | 2 |
| PARA <b>SOBRELLEVAR</b> LAS SITUACIONES HABITUALES DEL <b>DÍA A DÍA</b>                              | <input type="checkbox"/> | 3 |
| PARA INCREMENTAR O DISMINUIR LOS <b>EFFECTOS DE DROGAS</b> QUE HABÍA TOMADO                          | <input type="checkbox"/> | 4 |
| PARA <b>AFRONTAR</b> ALGUNOS <b>PROBLEMAS</b> VITALES (DIVORCIO, MUERTE DE UN FAMILIAR, DESPIDOS...) | <input type="checkbox"/> | 5 |
| POR SER VÍCTIMA DE <b>VIOLENCIA DE GÉNERO</b>                                                        | <input type="checkbox"/> | 6 |
| NUNCA HE TOMADO TRANQUILIZANTES, SEDANTES y/o SOMNIFEROS <u>SIN RECETA O PARA USO NO MÉDICO</u>      | <input type="checkbox"/> | 9 |

**TS6. Piense en la última vez que tomó TRANQUILIZANTES, SEDANTES y/o SOMNIFEROS SIN RECETA O PARA USO NO MÉDICO (medicamentos para calmar los nervios o la ansiedad o medicamentos para dormir) y seleccione el medio por el que los consiguió.** Marque sólo una opción.

|                                                                                                 |                          |   |
|-------------------------------------------------------------------------------------------------|--------------------------|---|
| A TRAVÉS DE UNA <b>RECETA MÉDICA</b> QUE ME RECETARON A MI                                      | <input type="checkbox"/> | 1 |
| A TRAVÉS DE UN <b>AMIGO O FAMILIAR</b>                                                          | <input type="checkbox"/> | 2 |
| A TRAVÉS DE UN <b>TRAFICANTE</b> O A UNA <b>PERSONA DESCONOCIDA</b>                             | <input type="checkbox"/> | 3 |
| A TRAVÉS DE <b>INTERNET</b>                                                                     | <input type="checkbox"/> | 4 |
| A TRAVÉS DE UNA <b>RECETA MÉDICA FALSA</b>                                                      | <input type="checkbox"/> | 5 |
| LO COMPRÉ EN UNA <b>FARMACIA SIN RECETA</b>                                                     | <input type="checkbox"/> | 6 |
| LO CONSEGUÍ <b>DE OTRA MANERA</b>                                                               | <input type="checkbox"/> | 7 |
| NUNCA HE TOMADO TRANQUILIZANTES, SEDANTES y/o SOMNIFEROS <u>SIN RECETA O PARA USO NO MÉDICO</u> | <input type="checkbox"/> | 9 |

**TS7. Estaría dispuesto a intentar conseguir ILEGALMENTE TRANQUILIZANTES, SEDANTES y/o SOMNIFEROS (medicamentos para calmar los nervios o la ansiedad o medicamentos para dormir) si no pudiera obtenerlos a través de receta médica?**

|    |                          |   |
|----|--------------------------|---|
| SÍ | <input type="checkbox"/> | 1 |
| NO | <input type="checkbox"/> | 2 |

**VD. HA TERMINADO LAS PREGUNTAS ACERCA DE TRANQUILIZANTES, SEDANTES y/o SOMNÍFEROS. GRACIAS. POR FAVOR, AHORA CONTINUE LEYENDO Y RESPONDIENDO POR VD. MISMO LAS PREGUNTAS QUE SIGUEN Y SI TIENE ALGUNA DUDA PUEDE CONSULTAR AL ENTREVISTADOR/A EN CUALQUIER MOMENTO**



## OTRAS SUSTANCIAS

**CONTESTE AHORA, POR FAVOR, A ALGUNAS PREGUNTAS SOBRE OTROS TIPOS DE SUSTANCIAS:**

- **CANNABIS, MARIHUANA o HACHÍS** [aceite de hachís, chocolate, porro, costo, hierba]
- **COCAÍNA EN POLVO** [cocaína, perico, farlopa, clorhidrato de cocaína]
- **COCAÍNA EN FORMA DE BASE** [base, cocaína cocinada, basuco, boliches, crack, roca]
- **ÉXTASIS U OTRAS DROGAS DE SÍNTESIS** [pastis, pirulas, cristal, MDMA]
- **ANFETAMINAS O SPEED** [anfetas]
- **ALUCINÓGENOS** [LSD, ácido, tripi, setas mágicas, ketamina, special-K, ketolar, imalgene]
- **HEROÍNA** [caballo, jaco]
- **INHALABLES VOLÁTILES** [cola, pegamento, disolvente, poppers, nitritos, gasolina]
- **GHB** [éxtasis líquido, gammahidroxibutirato, X-líquido, gamma-OH]
- **METANFETAMINA** [meth, ice, crystal]
- **SETAS MÁGICAS**

## CANNABIS – MARIHUANA – HACHÍS

[aceite de hachís, chocolate, porro, costo, hierba]

Marque con una "X" la casilla () correspondiente a su respuesta  
Recuerde que **sólo ha de marcar una casilla** en cada pregunta.

**M1. ¿Ha consumido, aunque sólo fuera UNA VEZ EN SU VIDA, CANNABIS, MARIHUANA o HACHÍS (aceite de hachís, chocolate, porro, costo, hierba)?**

|                                                 |                            |
|-------------------------------------------------|----------------------------|
| SÍ, HE CONSUMIDO CANNABIS, MARIHUANA o HACHÍS   | <input type="checkbox"/> 1 |
| NUNCA HE CONSUMIDO CANNABIS, MARIHUANA o HACHÍS | <input type="checkbox"/> 2 |

**M2. ¿Qué EDAD tenía la PRIMERA VEZ que consumió CANNABIS, MARIHUANA o HACHÍS?**

Si no está seguro, anote la edad aproximada. Escriba con números claros sobre la línea o marque el recuadro.

ANOTE LA EDAD: \_\_\_\_\_ AÑOS

|                                                 |                            |
|-------------------------------------------------|----------------------------|
| NUNCA HE CONSUMIDO CANNABIS, MARIHUANA o HACHÍS | <input type="checkbox"/> 1 |
|-------------------------------------------------|----------------------------|

**M3. ¿Cuándo ha sido la PRIMERA VEZ que ha consumido CANNABIS, MARIHUANA o HACHÍS?**

|                                                 |                            |
|-------------------------------------------------|----------------------------|
| HACE UN AÑO O MENOS                             | <input type="checkbox"/> 1 |
| HACE MÁS DE 1 AÑO                               | <input type="checkbox"/> 2 |
| NUNCA HE CONSUMIDO CANNABIS, MARIHUANA o HACHÍS | <input type="checkbox"/> 3 |

**M4. ¿Cuántos días ha consumido CANNABIS, MARIHUANA o HACHÍS en los **ÚLTIMOS 12 MESES**?**

**Recuerde que 12 meses=52 semanas=365 días**

|                    |                          |   |                                                                      |                          |   |
|--------------------|--------------------------|---|----------------------------------------------------------------------|--------------------------|---|
| ENTRE 1- 3 DÍAS    | <input type="checkbox"/> | 1 | ENTRE 30 - 150 DÍAS                                                  | <input type="checkbox"/> | 5 |
| ENTRE 4 - 9 DÍAS   | <input type="checkbox"/> | 2 | MAS DE 150 DÍAS                                                      | <input type="checkbox"/> | 6 |
| ENTRE 10 - 19 DÍAS | <input type="checkbox"/> | 3 | NO HE CONSUMIDO CANNABIS, MARIHUANA o HACHÍS EN LOS ÚLTIMOS 12 MESES | <input type="checkbox"/> | 7 |
| ENTRE 20 - 29 DÍAS | <input type="checkbox"/> | 4 | NUNCA HE CONSUMIDO CANNABIS, MARIHUANA o HACHÍS                      | <input type="checkbox"/> | 8 |

**M5. ¿Cuántos días ha consumido CANNABIS, MARIHUANA o HACHÍS en los **ÚLTIMOS 30 DÍAS**?**

|                    |                          |   |                                                                     |                          |   |
|--------------------|--------------------------|---|---------------------------------------------------------------------|--------------------------|---|
| ENTRE 1- 3 DÍAS    | <input type="checkbox"/> | 1 | 30 DÍAS                                                             | <input type="checkbox"/> | 5 |
| ENTRE 4 - 9 DÍAS   | <input type="checkbox"/> | 2 | NO HE CONSUMIDO CANNABIS, MARIHUANA o HACHÍS EN LOS ÚLTIMOS 30 DÍAS | <input type="checkbox"/> | 6 |
| ENTRE 10 - 19 DÍAS | <input type="checkbox"/> | 3 | NUNCA HE CONSUMIDO CANNABIS, MARIHUANA o HACHÍS                     | <input type="checkbox"/> | 7 |
| ENTRE 20 - 29 DÍAS | <input type="checkbox"/> | 4 |                                                                     |                          |   |

**M6. En los **ÚLTIMOS 30 DÍAS**, cuándo ha consumido CANNABIS, MARIHUANA o HACHÍS, ¿Cuántos **PORROS** ha fumado **EN EL MISMO DÍA por término medio**? No considere que fumó porros si lo único que hizo fue dar unas caladas al porro de otra persona.**

| \_\_\_ | \_\_\_ | **PORROS**

|                                                                     |                          |   |
|---------------------------------------------------------------------|--------------------------|---|
| NO HE CONSUMIDO CANNABIS, MARIHUANA o HACHÍS EN LOS ÚLTIMOS 30 DÍAS | <input type="checkbox"/> | 1 |
| NUNCA HE CONSUMIDO CANNABIS, MARIHUANA o HACHÍS                     | <input type="checkbox"/> | 2 |

**M7. En los **ÚLTIMOS 30 DÍAS**, ¿Cuándo ha consumido CANNABIS, MARIHUANA o HACHÍS, qué ha fumado?**

|                                                                     |                          |   |
|---------------------------------------------------------------------|--------------------------|---|
| PRINCIPALMENTE MARIHUANA ( <b>HIERBA</b> )                          | <input type="checkbox"/> | 1 |
| PRINCIPALMENTE HACHÍS ( <b>RESINA, CHOCOLATE</b> )                  | <input type="checkbox"/> | 2 |
| DE LOS <b>2 TIPOS</b>                                               | <input type="checkbox"/> | 3 |
| NO HE CONSUMIDO CANNABIS, MARIHUANA o HACHÍS EN LOS ÚLTIMOS 30 DÍAS | <input type="checkbox"/> | 4 |
| NUNCA HE CONSUMIDO CANNABIS, MARIHUANA o HACHÍS                     | <input type="checkbox"/> | 0 |

**M8. En los ÚLTIMOS 30 DÍAS, cuando ha consumido CANNABIS, MARIHUANA o HACHÍS, ¿cómo lo ha consumido?** Puede marcar varias opciones.

|                                                                     |                            |
|---------------------------------------------------------------------|----------------------------|
| EN FORMA DE <b>PORRO</b> O CANUTO                                   | <input type="checkbox"/> 1 |
| USANDO PIPAS DE AGUA, BONGS, <b>CACHIMBAS</b> , SHISHAS             | <input type="checkbox"/> 2 |
| USANDO <b>CIGARRILLOS ELECTRÓNICOS</b>                              | <input type="checkbox"/> 3 |
| POR VÍA ORAL A TRAVÉS DE <b>PASTELES</b> , GALLETAS, CHUPITOS       | <input type="checkbox"/> 4 |
| NO HE CONSUMIDO CANNABIS, MARIHUANA o HACHÍS EN LOS ÚLTIMOS 30 DÍAS | <input type="checkbox"/> 9 |
| NUNCA HE CONSUMIDO CANNABIS, MARIHUANA o HACHÍS                     | <input type="checkbox"/> 0 |

**M9. En los ÚLTIMOS 30 DÍAS, ¿Cuándo ha consumido CANNABIS, MARIHUANA o HACHÍS, lo ha mezclado con TABACO?**

SÍ  1

NO  2

|                                                                     |                            |
|---------------------------------------------------------------------|----------------------------|
| NO HE CONSUMIDO CANNABIS, MARIHUANA o HACHÍS EN LOS ÚLTIMOS 30 DÍAS | <input type="checkbox"/> 1 |
| NUNCA HE CONSUMIDO CANNABIS, MARIHUANA o HACHÍS                     | <input type="checkbox"/> 2 |

**M10. Si fuese legal el consumo de CANNABIS, MARIHUANA o HACHÍS, ¿lo probaría?**

SÍ  1

NO  2

|                  |                            |
|------------------|----------------------------|
| YA LO HE PROBADO | <input type="checkbox"/> 1 |
|------------------|----------------------------|

**POR FAVOR, RESPONDA A LAS SIGUIENTES PREGUNTAS SI HA CONSUMIDO  
CANNABIS, MARIHUANA o HACHÍS EN LOS  
ÚLTIMOS 12 MESES**

**Algunas de las siguientes preguntas le parecerán similares, pero ha de CONTESTARLAS TODAS porque forman parte de cuestionarios internacionales y debemos analizarlas conjuntamente**

No he consumido hachís o marihuana en los últimos 12 meses → **Pasa a la pregunta C1**

**M11. ¿Con qué frecuencia le ha ocurrido algo de lo que se describe a continuación en los ÚLTIMOS 12 MESES?** Ponga una 'X' en un cuadrado de cada fila. En total ha de poner 6 "X", porque hay 6 filas de cuadrillos.

|                                                                                                                                                               | NUNCA                      | RARAMENTE                  | DE VEZ EN CUANDO           | BASTANTE A MENUDO          | MUY A MENUDO               |
|---------------------------------------------------------------------------------------------------------------------------------------------------------------|----------------------------|----------------------------|----------------------------|----------------------------|----------------------------|
| ¿Ha fumado cannabis <b>antes del mediodía</b> ?                                                                                                               | <input type="checkbox"/> 1 | <input type="checkbox"/> 2 | <input type="checkbox"/> 3 | <input type="checkbox"/> 4 | <input type="checkbox"/> 5 |
| ¿Ha fumado cannabis <b>estando solo/a</b> ?                                                                                                                   | <input type="checkbox"/> 1 | <input type="checkbox"/> 2 | <input type="checkbox"/> 3 | <input type="checkbox"/> 4 | <input type="checkbox"/> 5 |
| ¿Ha tenido <b>problemas de memoria</b> al fumar cannabis?                                                                                                     | <input type="checkbox"/> 1 | <input type="checkbox"/> 2 | <input type="checkbox"/> 3 | <input type="checkbox"/> 4 | <input type="checkbox"/> 5 |
| ¿Le han dicho los amigos o miembros de tu familia que <b>deberías reducir el consumo</b> de cannabis?                                                         | <input type="checkbox"/> 1 | <input type="checkbox"/> 2 | <input type="checkbox"/> 3 | <input type="checkbox"/> 4 | <input type="checkbox"/> 5 |
| ¿Ha <b>intentado reducir</b> o dejar de consumir cannabis <b>sin conseguirlo</b> ?                                                                            | <input type="checkbox"/> 1 | <input type="checkbox"/> 2 | <input type="checkbox"/> 3 | <input type="checkbox"/> 4 | <input type="checkbox"/> 5 |
| ¿Ha tenido <b>problemas</b> debido a su consumo de cannabis (disputa, pelea, accidente, mal resultado escolar, bajo rendimiento laboral? ¿Cuáles?:<br>/...../ | <input type="checkbox"/> 1 | <input type="checkbox"/> 2 | <input type="checkbox"/> 3 | <input type="checkbox"/> 4 | <input type="checkbox"/> 5 |

**M12. En los ÚLTIMOS 12 MESES ¿ha iniciado algún TRATAMIENTO para dejar o reducir el consumo de CANNABIS, MARIHUANA o HACHÍS (hierba, chocolate, porro, costo, aceite de hachís)?**

SÍ  1  
 NO  2

## COCAÍNA EN POLVO

[cocaína, perico, farlopa, clorhidrato de cocaína]

Marque con una "X" la casilla () correspondiente a su respuesta  
 Recuerde que **sólo ha de marcar una casilla** en cada pregunta.

**C1. ¿Ha consumido, aunque sólo fuera UNA VEZ EN SU VIDA, COCAÍNA EN POLVO (cocaína, perico, farlopa, clorhidrato de cocaína)?**

|                                     |                            |
|-------------------------------------|----------------------------|
| SÍ, HE CONSUMIDO COCAÍNA EN POLVO   | <input type="checkbox"/> 1 |
| NUNCA HE CONSUMIDO COCAÍNA EN POLVO | <input type="checkbox"/> 2 |

**C2. ¿Qué EDAD tenía la PRIMERA VEZ que consumió COCAÍNA EN POLVO?**

Si no está seguro, anote la edad aproximada. Escriba con números claros sobre la línea o marque el recuadro.

ANOTE LA EDAD: \_\_\_\_\_ AÑOS

|                                     |                            |
|-------------------------------------|----------------------------|
| NUNCA HE CONSUMIDO COCAÍNA EN POLVO | <input type="checkbox"/> 1 |
|-------------------------------------|----------------------------|

**C3. ¿Cuándo ha sido la PRIMERA VEZ que ha consumido COCAÍNA EN POLVO?**

|                                     |                            |
|-------------------------------------|----------------------------|
| HACE UN AÑO O MENOS                 | <input type="checkbox"/> 1 |
| HACE MÁS DE 1 AÑO                   | <input type="checkbox"/> 2 |
| NUNCA HE CONSUMIDO COCAÍNA EN POLVO | <input type="checkbox"/> 3 |

**C4. ¿Cuántos días ha consumido COCAÍNA EN POLVO en los ÚLTIMOS 12 MESES?**

**Recuerde que 12 meses=52 semanas=365 días**

|                    |                          |   |                                                          |                          |   |
|--------------------|--------------------------|---|----------------------------------------------------------|--------------------------|---|
| ENTRE 1- 3 DÍAS    | <input type="checkbox"/> | 1 | ENTRE 30 - 150 DÍAS                                      | <input type="checkbox"/> | 5 |
| ENTRE 4 - 9 DÍAS   | <input type="checkbox"/> | 2 | MAS DE 150 DÍAS                                          | <input type="checkbox"/> | 6 |
| ENTRE 10 - 19 DÍAS | <input type="checkbox"/> | 3 | NO HE CONSUMIDO COCAÍNA EN POLVO EN LOS ÚLTIMOS 12 MESES | <input type="checkbox"/> | 7 |
| ENTRE 20 - 29 DÍAS | <input type="checkbox"/> | 4 | NUNCA HE CONSUMIDO COCAÍNA EN POLVO                      | <input type="checkbox"/> | 8 |

**C5. ¿Cuántos días ha consumido COCAÍNA EN POLVO en los ÚLTIMOS 30 DÍAS?**

|                    |                          |   |                                                         |                          |   |
|--------------------|--------------------------|---|---------------------------------------------------------|--------------------------|---|
| ENTRE 1- 3 DÍAS    | <input type="checkbox"/> | 1 | 30 DÍAS                                                 | <input type="checkbox"/> | 5 |
| ENTRE 4 - 9 DÍAS   | <input type="checkbox"/> | 2 | NO HE CONSUMIDO COCAÍNA EN POLVO EN LOS ÚLTIMOS 30 DÍAS | <input type="checkbox"/> | 6 |
| ENTRE 10 - 19 DÍAS | <input type="checkbox"/> | 3 | NUNCA HE CONSUMIDO COCAÍNA EN POLVO                     | <input type="checkbox"/> | 7 |
| ENTRE 20 - 29 DÍAS | <input type="checkbox"/> | 4 |                                                         |                          |   |

## COCAÍNA EN FORMA DE BASE

[base, cocaína cocinada, basuco, boliches, crack, roca]

Marque con una "X" la casilla () correspondiente a su respuesta  
 Recuerde que **sólo ha de marcar una casilla** en cada pregunta.

**B1. Indique si usted ha consumido COCAÍNA EN FORMA DE BASE ALGUNA VEZ EN LA VIDA, y/o en los ÚLTIMOS 12 MESES y/o en los ÚLTIMOS 30 DÍAS. Si ha consumido anote en el recuadro correspondiente la EDAD en que la consumió por PRIMERA VEZ.**

|                                                                                            | ¿Ha consumido ALGUNA VEZ EN LA VIDA?  |                                       | ¿Ha consumido alguna vez en los ÚLTIMOS 12 MESES? |                                       | ¿Ha consumido alguna vez en los ÚLTIMOS 30 DÍAS? |                                       | EDAD en que consumió <u>por primera vez en su vida</u> |
|--------------------------------------------------------------------------------------------|---------------------------------------|---------------------------------------|---------------------------------------------------|---------------------------------------|--------------------------------------------------|---------------------------------------|--------------------------------------------------------|
|                                                                                            | No                                    | Sí                                    | No                                                | Sí                                    | No                                               | Sí                                    |                                                        |
| <b>COCAÍNA EN FORMA DE BASE</b><br>[base, cocaína cocinada, basuco, boliches, crack, roca] | <input type="checkbox"/> <sub>1</sub> | <input type="checkbox"/> <sub>2</sub> | <input type="checkbox"/> <sub>1</sub>             | <input type="checkbox"/> <sub>2</sub> | <input type="checkbox"/> <sub>1</sub>            | <input type="checkbox"/> <sub>2</sub> |                                                        |

**B2. ¿Cuándo ha sido la PRIMERA VEZ que ha consumido COCAÍNA EN FORMA DE BASE?**

|                                             |                            |
|---------------------------------------------|----------------------------|
| HACE UN AÑO O MENOS                         | <input type="checkbox"/> 1 |
| HACE MÁS DE 1 AÑO                           | <input type="checkbox"/> 2 |
| NUNCA HE CONSUMIDO COCAÍNA EN FORMA DE BASE | <input type="checkbox"/> 3 |

## ÉXTASIS U OTRAS DROGAS DE SÍNTESIS

[pastis, pirulas, cristal, MDMA]

Marque con una "X" la casilla () correspondiente a su respuesta  
 Recuerde que **sólo ha de marcar una casilla** en cada pregunta.

**E1. Indique si usted ha consumido ÉXTASIS ALGUNA VEZ EN LA VIDA, y/o en los ÚLTIMOS 12 MESES y/o en los ÚLTIMOS 30 DÍAS. Si ha consumido anote en el recuadro correspondiente la EDAD en que la consumió por PRIMERA VEZ.**

|                                                                               | ¿Ha consumido ALGUNA VEZ EN LA VIDA?  |                                       | ¿Ha consumido alguna vez en los ÚLTIMOS 12 MESES? |                                       | ¿Ha consumido alguna vez en los ÚLTIMOS 30 DÍAS? |                                       | EDAD en que consumió <u>por primera vez en su vida</u> |
|-------------------------------------------------------------------------------|---------------------------------------|---------------------------------------|---------------------------------------------------|---------------------------------------|--------------------------------------------------|---------------------------------------|--------------------------------------------------------|
|                                                                               | No                                    | Sí                                    | No                                                | Sí                                    | No                                               | Sí                                    |                                                        |
| <b>ÉXTASIS U OTRAS DROGAS DE SÍNTESIS</b><br>(pastis, pirulas, crista, MDMAI) | <input type="checkbox"/> <sub>1</sub> | <input type="checkbox"/> <sub>2</sub> | <input type="checkbox"/> <sub>1</sub>             | <input type="checkbox"/> <sub>2</sub> | <input type="checkbox"/> <sub>1</sub>            | <input type="checkbox"/> <sub>2</sub> |                                                        |

## ANFETAMINAS O SPEED

[anfetas]

Marque con una "X" la casilla () correspondiente a su respuesta  
 Recuerde que **sólo ha de marcar una casilla** en cada pregunta.

**Sp1.** Indique si usted ha consumido **ANFETAMINAS O SPEED ALGUNA VEZ EN LA VIDA**, y/o en los **ÚLTIMOS 12 MESES** y/o en los **ÚLTIMOS 30 DÍAS**. Si ha consumido anote en el recuadro correspondiente la **EDAD** en que la consumió por **PRIMERA VEZ**.

|                                         | ¿Ha consumido ALGUNA VEZ EN LA VIDA?  |                                       | ¿Ha consumido alguna vez en los ÚLTIMOS 12 MESES? |                                       | ¿Ha consumido alguna vez en los ÚLTIMOS 30 DÍAS? |                                       | EDAD en que consumió por primera vez en su vida |
|-----------------------------------------|---------------------------------------|---------------------------------------|---------------------------------------------------|---------------------------------------|--------------------------------------------------|---------------------------------------|-------------------------------------------------|
|                                         | No                                    | Sí                                    | No                                                | Sí                                    | No                                               | Sí                                    |                                                 |
| <b>ANFETAMINAS O SPEED</b><br>(anfetas) | <input type="checkbox"/> <sub>1</sub> | <input type="checkbox"/> <sub>2</sub> | <input type="checkbox"/> <sub>1</sub>             | <input type="checkbox"/> <sub>2</sub> | <input type="checkbox"/> <sub>1</sub>            | <input type="checkbox"/> <sub>2</sub> |                                                 |

## ALUCINÓGENOS

[LSD, ácido, tripi, setas mágicas, ketamina, special-K, ketolar, imalgene]

Marque con una "X" la casilla () correspondiente a su respuesta  
 Recuerde que **sólo ha de marcar una casilla** en cada pregunta.

**Alu1.** Indique si usted ha consumido **ALUCINÓGENOS ALGUNA VEZ EN LA VIDA**, y/o en los **ÚLTIMOS 12 MESES** y/o en los **ÚLTIMOS 30 DÍAS**. Si ha consumido anote en el recuadro correspondiente la **EDAD** en que la consumió por **PRIMERA VEZ**.

|                                                                                                   | ¿Ha consumido ALGUNA VEZ EN LA VIDA?  |                                       | ¿Ha consumido alguna vez en los ÚLTIMOS 12 MESES? |                                       | ¿Ha consumido alguna vez en los ÚLTIMOS 30 DÍAS? |                                       | EDAD en que consumió por primera vez en su vida |
|---------------------------------------------------------------------------------------------------|---------------------------------------|---------------------------------------|---------------------------------------------------|---------------------------------------|--------------------------------------------------|---------------------------------------|-------------------------------------------------|
|                                                                                                   | No                                    | Sí                                    | No                                                | Sí                                    | No                                               | Sí                                    |                                                 |
| <b>ALUCINÓGENOS</b><br>(LSD, ácido, tripi, setas mágicas, ketamina, special-K, ketolar, imalgene) | <input type="checkbox"/> <sub>1</sub> | <input type="checkbox"/> <sub>2</sub> | <input type="checkbox"/> <sub>1</sub>             | <input type="checkbox"/> <sub>2</sub> | <input type="checkbox"/> <sub>1</sub>            | <input type="checkbox"/> <sub>2</sub> |                                                 |

## HEROÍNA

[caballo, jaco]

Marque con una "X" la casilla () correspondiente a su respuesta  
 Recuerde que **sólo ha de marcar una casilla** en cada pregunta.

**H1.** Indique si usted ha consumido **HEROÍNA ALGUNA VEZ EN LA VIDA**, y/o en los **ÚLTIMOS 12 MESES** y/o en los **ÚLTIMOS 30 DÍAS**. Si ha consumido anote en el recuadro correspondiente la **EDAD** en que la consumió por **PRIMERA VEZ**.

|                                   | ¿Ha consumido ALGUNA VEZ EN LA VIDA?  |                                       | ¿Ha consumido alguna vez en los ÚLTIMOS 12 MESES? |                                       | ¿Ha consumido alguna vez en los ÚLTIMOS 30 DÍAS? |                                       | EDAD en que consumió por primera vez en su vida |
|-----------------------------------|---------------------------------------|---------------------------------------|---------------------------------------------------|---------------------------------------|--------------------------------------------------|---------------------------------------|-------------------------------------------------|
|                                   | No                                    | Sí                                    | No                                                | Sí                                    | No                                               | Sí                                    |                                                 |
| <b>HEROÍNA</b><br>(caballo, jaco) | <input type="checkbox"/> <sub>1</sub> | <input type="checkbox"/> <sub>2</sub> | <input type="checkbox"/> <sub>1</sub>             | <input type="checkbox"/> <sub>2</sub> | <input type="checkbox"/> <sub>1</sub>            | <input type="checkbox"/> <sub>2</sub> |                                                 |

## INHALABLES VOLÁTILES

[cola, pegamento, disolvente, poppers, nitritos, gasolina]

Marque con una "X" la casilla () correspondiente a su respuesta  
 Recuerde que **sólo ha de marcar una casilla** en cada preunta.

**InV1.** Indique si usted ha consumido **INHALABLES VOLÁTILES ALGUNA VEZ EN LA VIDA**, y/o en los **ÚLTIMOS 12 MESES** y/o en los **ÚLTIMOS 30 DÍAS**. Si ha consumido anote en el recuadro correspondiente la **EDAD** en que la consumió por **PRIMERA VEZ**.

|                                                                                           | ¿Ha consumido ALGUNA VEZ EN LA VIDA?  |                                       | ¿Ha consumido alguna vez en los ÚLTIMOS 12 MESES? |                                       | ¿Ha consumido alguna vez en los ÚLTIMOS 30 DÍAS? |                                       | EDAD en que consumió <u>por primera vez en su vida</u> |
|-------------------------------------------------------------------------------------------|---------------------------------------|---------------------------------------|---------------------------------------------------|---------------------------------------|--------------------------------------------------|---------------------------------------|--------------------------------------------------------|
|                                                                                           | No                                    | Sí                                    | No                                                | Sí                                    | No                                               | Sí                                    |                                                        |
| <b>INHALABLES VOLÁTILES</b><br>(cola, pegamento, disolvente, poppers, nitritos, gasolina) | <input type="checkbox"/> <sub>1</sub> | <input type="checkbox"/> <sub>2</sub> | <input type="checkbox"/> <sub>1</sub>             | <input type="checkbox"/> <sub>2</sub> | <input type="checkbox"/> <sub>1</sub>            | <input type="checkbox"/> <sub>2</sub> |                                                        |

## GHB

[éxtasis líquido, gammahidroxibutirato, X-líquido, gamma-OH]

Marque con una "X" la casilla () correspondiente a su respuesta  
 Recuerde que **sólo ha de marcar una casilla** en cada pregunta.

**GHB1.** Indique si usted ha consumido **GHB ALGUNA VEZ EN LA VIDA**, y/o en los **ÚLTIMOS 12 MESES** y/o en los **ÚLTIMOS 30 DÍAS**. Si ha consumido anote en el recuadro correspondiente la **EDAD** en que la consumió por **PRIMERA VEZ**.

|                                                                            | ¿Ha consumido ALGUNA VEZ EN LA VIDA?  |                                       | ¿Ha consumido alguna vez en los ÚLTIMOS 12 MESES? |                                       | ¿Ha consumido alguna vez en los ÚLTIMOS 30 DÍAS? |                                       | EDAD en que consumió <u>por primera vez en su vida</u> |
|----------------------------------------------------------------------------|---------------------------------------|---------------------------------------|---------------------------------------------------|---------------------------------------|--------------------------------------------------|---------------------------------------|--------------------------------------------------------|
|                                                                            | No                                    | Sí                                    | No                                                | Sí                                    | No                                               | Sí                                    |                                                        |
| <b>GHB</b><br>(éxtasis líquido, gammahidroxibutirato, X-líquido, gamma-OH) | <input type="checkbox"/> <sub>1</sub> | <input type="checkbox"/> <sub>2</sub> | <input type="checkbox"/> <sub>1</sub>             | <input type="checkbox"/> <sub>2</sub> | <input type="checkbox"/> <sub>1</sub>            | <input type="checkbox"/> <sub>2</sub> |                                                        |



## METANFETAMINA

[meth, ice, crystal]

Marque con una "X" la casilla () correspondiente a su respuesta  
 Recuerde que **sólo ha de marcar una casilla** en cada pregunta.

**MET1.** Indique si usted ha consumido **METANFETAMINA** ALGUNA VEZ EN LA VIDA, y/o en los **ÚLTIMOS 12 MESES** y/o en los **ÚLTIMOS 30 DÍAS**. Si ha consumido anote en el recuadro correspondiente la **EDAD** en que la consumió por **PRIMERA VEZ**.

|                                              | ¿Ha consumido ALGUNA VEZ EN LA VIDA?  |                                       | ¿Ha consumido alguna vez en los ÚLTIMOS 12 MESES? |                                       | ¿Ha consumido alguna vez en los ÚLTIMOS 30 DÍAS? |                                       | EDAD en que consumió por primera vez en su vida |
|----------------------------------------------|---------------------------------------|---------------------------------------|---------------------------------------------------|---------------------------------------|--------------------------------------------------|---------------------------------------|-------------------------------------------------|
|                                              | No                                    | Sí                                    | No                                                | Sí                                    | No                                               | Sí                                    |                                                 |
| <b>METANFETAMINA</b><br>(meth, ice, crystal) | <input type="checkbox"/> <sub>1</sub> | <input type="checkbox"/> <sub>2</sub> | <input type="checkbox"/> <sub>1</sub>             | <input type="checkbox"/> <sub>2</sub> | <input type="checkbox"/> <sub>1</sub>            | <input type="checkbox"/> <sub>2</sub> |                                                 |

## SETAS MÁGICAS

Marque con una "X" la casilla () correspondiente a su respuesta  
 Recuerde que **sólo ha de marcar una casilla** en cada pregunta.

**SM1.** Indique si usted ha consumido **SETAS MÁGICAS** ALGUNA VEZ EN LA VIDA, y/o en los **ÚLTIMOS 12 MESES** y/o en los **ÚLTIMOS 30 DÍAS**. Si ha consumido anote en el recuadro correspondiente la **EDAD** en que la consumió por **PRIMERA VEZ**.

|                      | ¿Ha consumido ALGUNA VEZ EN LA VIDA?  |                                       | ¿Ha consumido alguna vez en los ÚLTIMOS 12 MESES? |                                       | ¿Ha consumido alguna vez en los ÚLTIMOS 30 DÍAS? |                                       | EDAD en que consumió por primera vez en su vida |
|----------------------|---------------------------------------|---------------------------------------|---------------------------------------------------|---------------------------------------|--------------------------------------------------|---------------------------------------|-------------------------------------------------|
|                      | No                                    | Sí                                    | No                                                | Sí                                    | No                                               | Sí                                    |                                                 |
| <b>SETAS MÁGICAS</b> | <input type="checkbox"/> <sub>1</sub> | <input type="checkbox"/> <sub>2</sub> | <input type="checkbox"/> <sub>1</sub>             | <input type="checkbox"/> <sub>2</sub> | <input type="checkbox"/> <sub>1</sub>            | <input type="checkbox"/> <sub>2</sub> |                                                 |

## DROGAS INYECTADAS

Marque con una "X" la casilla (  ) correspondiente a su respuesta  
**Recuerde que sólo ha de marcar una casilla en cada pregunta.**

**Iny1. ¿Se ha inyectado Vd. ALGUNA VEZ EN LA VIDA HEROÍNA, COCAÍNA U OTRAS DROGAS ILEGALES?**

|                                                              |                            |
|--------------------------------------------------------------|----------------------------|
| Sí                                                           | <input type="checkbox"/> 1 |
| NO, NUNCA ME HE INYECTADO HEROÍNA, COCAÍNA O DROGAS ILEGALES | <input type="checkbox"/> 2 |

**Iny2. En los ÚLTIMOS 12 MESES, ¿Se ha inyectado Vd. alguna vez HEROÍNA, COCAÍNA U OTRAS DROGAS ILEGALES?**

|                                                                                     |                            |
|-------------------------------------------------------------------------------------|----------------------------|
| Sí                                                                                  | <input type="checkbox"/> 1 |
| NO ME HE INYECTADO HEROÍNA, COCAÍNA U OTRAS DROGAS ILEGALES EN LOS ÚLTIMOS 12 MESES | <input type="checkbox"/> 2 |
| NUNCA ME HE INYECTADO HEROÍNA, COCAÍNA U OTRAS DROGAS ILEGALES                      | <input type="checkbox"/> 3 |

**Iny3. Si se ha inyectado en los ÚLTIMOS 12 MESES, HEROÍNA, COCAÍNA U OTRAS DROGAS ILEGALES ¿Ha compartido alguna vez con otra persona jeringuillas o cualquier otro material de inyección (foallitas, cucharas, gomas...)?**

|                                                                                        |                            |
|----------------------------------------------------------------------------------------|----------------------------|
| SÍ HE COMPARTIDO JERINGUILLAS U OTRO MATERIAL DE INYECCIÓN                             | <input type="checkbox"/> 1 |
| NO HE COMPARTIDO JERINGUILLAS U OTRO MATERIAL DE INYECCIÓN                             | <input type="checkbox"/> 2 |
| NUNCA ME HE INYECTADO HEROÍNA, COCAÍNA U OTRAS DROGAS ILEGALES EN LOS ÚLTIMOS 12 MESES | <input type="checkbox"/> 3 |

## NUEVAS SUSTANCIAS

Marque con una "X" la casilla  correspondiente a su respuesta  
 Recuerde que **sólo ha de marcar una casilla** en cada pregunta.

**NS1. En la actualidad se encuentran disponibles NUEVAS sustancias que imitan el efecto de drogas ilegales (cannabis, cocaína, éxtasis...). Estas nuevas sustancias (keta, spice, cannabinoides sintéticos, marihuana sintética, miau miau, flakka, superman, catinonas, mefedrona, derivados de los fentanilos, metoxetamina, NBOMe, ayahuasca, kratom...) se pueden presentar en forma de hierbas, pastillas, polvos, líquidos, inciensos, etc... Conteste las siguientes preguntas referentes a estas nuevas sustancias.**

| ¿Ha oído hablar de estas nuevas sustancias? |                                       | ¿Las ha consumido ALGUNA VEZ EN LA VIDA? |                                       | ¿Las ha consumido alguna vez en los ÚLTIMOS 12 MESES? |                                       | ¿Las ha consumido alguna vez en los ÚLTIMOS 30 DÍAS? |                                       |
|---------------------------------------------|---------------------------------------|------------------------------------------|---------------------------------------|-------------------------------------------------------|---------------------------------------|------------------------------------------------------|---------------------------------------|
| No                                          | Sí                                    | No                                       | Sí                                    | No                                                    | Sí                                    | No                                                   | Sí                                    |
| <input type="checkbox"/> <sub>1</sub>       | <input type="checkbox"/> <sub>2</sub> | <input type="checkbox"/> <sub>1</sub>    | <input type="checkbox"/> <sub>2</sub> | <input type="checkbox"/> <sub>1</sub>                 | <input type="checkbox"/> <sub>2</sub> | <input type="checkbox"/> <sub>1</sub>                | <input type="checkbox"/> <sub>2</sub> |

**NS2. ¿Dónde consiguió o le ofrecieron este tipo de sustancias, EN LOS ÚLTIMOS 12 MESES?** Puede marcar una o varias opciones.

|                                                                        |                            |
|------------------------------------------------------------------------|----------------------------|
| ME LA OFRECIÓ UN <b>AMIGO</b>                                          | <input type="checkbox"/> 1 |
| LAS COMPRÉ EN UNA <b>TIENDA ESPECIALIZADA</b> (SMART SHOP O HEAD SHOP) | <input type="checkbox"/> 2 |
| A TRAVÉS DE UN <b>VENDEDOR</b> (Camello)                               | <input type="checkbox"/> 3 |
| A TRAVÉS DE <b>INTERNET</b>                                            | <input type="checkbox"/> 4 |
| ME LA OFRECIERON EN UNA <b>FIESTA</b> , EN UN PUB, EN UN BAR           | <input type="checkbox"/> 5 |
| OTROS SITIOS                                                           | <input type="checkbox"/> 6 |
| NO HE CONSUMIDO O NO ME HA OFRECIDO ESTE TIPO DE SUSTANCIAS            | <input type="checkbox"/> 7 |

**NS3. Para cada una de las siguientes sustancias, indique si usted las ha consumido ALGUNA VEZ EN LA VIDA, y/o en los ÚLTIMOS 12 MESES y/o en los ÚLTIMOS 30 DÍAS. Si ha consumido, anote en el recuadro correspondiente la EDAD en que la consumió por PRIMERA VEZ.**

|                                                                                                                                         | ¿Ha consumido ALGUNA VEZ EN LA VIDA?  |                                       | ¿Ha consumido alguna vez en los ÚLTIMOS 12 MESES? |                                       | ¿Ha consumido alguna vez en los ÚLTIMOS 30 DÍAS? |                                       | EDAD en que consumió <u>por primera vez en su vida</u> | ¿La ha conseguido por internet?       |                                       |
|-----------------------------------------------------------------------------------------------------------------------------------------|---------------------------------------|---------------------------------------|---------------------------------------------------|---------------------------------------|--------------------------------------------------|---------------------------------------|--------------------------------------------------------|---------------------------------------|---------------------------------------|
|                                                                                                                                         | No                                    | Sí                                    | No                                                | Sí                                    | No                                               | Sí                                    |                                                        | No                                    | SI                                    |
| <b>KETAMINA</b> (también llamada el K, Ketolar, Special K, vitamina K, polvo k)                                                         | <input type="checkbox"/> <sub>1</sub> | <input type="checkbox"/> <sub>2</sub> | <input type="checkbox"/> <sub>1</sub>             | <input type="checkbox"/> <sub>2</sub> | <input type="checkbox"/> <sub>1</sub>            | <input type="checkbox"/> <sub>2</sub> |                                                        | <input type="checkbox"/> <sub>1</sub> | <input type="checkbox"/> <sub>2</sub> |
| <b>SPICE</b> (también llamada spice drugs, cannabinoides sintéticos, marihuana sintética)                                               | <input type="checkbox"/> <sub>1</sub> | <input type="checkbox"/> <sub>2</sub> | <input type="checkbox"/> <sub>1</sub>             | <input type="checkbox"/> <sub>2</sub> | <input type="checkbox"/> <sub>1</sub>            | <input type="checkbox"/> <sub>2</sub> |                                                        | <input type="checkbox"/> <sub>1</sub> | <input type="checkbox"/> <sub>2</sub> |
| <b>MEFEDRONA</b> (también llamada miau-miau, 4-MMC, burbujas azules, catmef)                                                            | <input type="checkbox"/> <sub>1</sub> | <input type="checkbox"/> <sub>2</sub> | <input type="checkbox"/> <sub>1</sub>             | <input type="checkbox"/> <sub>2</sub> | <input type="checkbox"/> <sub>1</sub>            | <input type="checkbox"/> <sub>2</sub> |                                                        | <input type="checkbox"/> <sub>1</sub> | <input type="checkbox"/> <sub>2</sub> |
| <b>SALVIA DIVINORUM</b> (también llamada ska pastora, ska María, hierba María o hierba de los Dioses, Sally D, Lady Salvia, Magic Mint) | <input type="checkbox"/> <sub>1</sub> | <input type="checkbox"/> <sub>2</sub> | <input type="checkbox"/> <sub>1</sub>             | <input type="checkbox"/> <sub>2</sub> | <input type="checkbox"/> <sub>1</sub>            | <input type="checkbox"/> <sub>2</sub> |                                                        | <input type="checkbox"/> <sub>1</sub> | <input type="checkbox"/> <sub>2</sub> |
| <b>AYAHUASCA</b>                                                                                                                        | <input type="checkbox"/> <sub>1</sub> | <input type="checkbox"/> <sub>2</sub> | <input type="checkbox"/> <sub>1</sub>             | <input type="checkbox"/> <sub>2</sub> | <input type="checkbox"/> <sub>1</sub>            | <input type="checkbox"/> <sub>2</sub> |                                                        | <input type="checkbox"/> <sub>1</sub> | <input type="checkbox"/> <sub>2</sub> |

**VD. HA TERMINADO LAS PREGUNTAS ACERCA DE NUEVAS SUSTANCIAS. GRACIAS.  
 POR FAVOR, AHORA CONTINUE LEYENDO Y RESPONDIENDO POR VD. MISMO LAS PREGUNTAS QUE SIGUEN Y SI TIENE ALGUNA DUDA PUEDE CONSULTAR AL ENTREVISTADOR/A EN CUALQUIER MOMENTO**

## TRATAMIENTO

Marque con una "X" la casilla (  ) correspondiente a su respuesta  
 Recuerde que **sólo ha de marcar una casilla** en cada pregunta.

**TR1. ¿Conoce personalmente a alguien que haya consumido HEROÍNA O SE HAYA INYECTADO DROGAS ILEGALES en los ÚLTIMOS 12 MESES?**

|                        |                          |   |
|------------------------|--------------------------|---|
| SÍ, CONOZCO A ALGUIEN  | <input type="checkbox"/> | 1 |
| NO, NO CONOZCO A NADIE | <input type="checkbox"/> | 2 |

**TR2. Por favor, invente un nombre para cada persona que conozca personalmente y que sabe que ha consumido HEROÍNA O SE HA INYECTADO DROGAS ILEGALES en los ÚLTIMOS 12 MESES, y luego para cada una de ellas, conteste las preguntas de la siguiente tabla.**

Si tiene dificultades para rellenarla, pídale ayuda al entrevistador. Él podrá explicarle mejor las instrucciones.

| Nombre inventado                                                                                                                      |       | ¿Se ha inyectado <u>drogas ilegales</u> en los <b>ÚLTIMOS 12 MESES?</b> |                          |                          | ¿Ha consumido <u>heroína</u> en los <b>ÚLTIMOS 12 MESES?</b> |                          |                          | ¿Ha iniciado un <u>tratamiento ambulatorio</u> por <u>drogas ilegales</u> en los <b>ÚLTIMOS 12 MESES?</b> |                          |                          | ¿Estuvo motivado dicho <u>tratamiento</u> por la heroína? |                          |                          | ¿Ha estado en <u>mantenimiento con metadona</u> en los <b>ÚLTIMOS 12 MESES?</b> |                          |                          |
|---------------------------------------------------------------------------------------------------------------------------------------|-------|-------------------------------------------------------------------------|--------------------------|--------------------------|--------------------------------------------------------------|--------------------------|--------------------------|-----------------------------------------------------------------------------------------------------------|--------------------------|--------------------------|-----------------------------------------------------------|--------------------------|--------------------------|---------------------------------------------------------------------------------|--------------------------|--------------------------|
|                                                                                                                                       |       | SÍ                                                                      | NO                       | NO SABE                  | SÍ                                                           | NO                       | NO SABE                  | SÍ                                                                                                        | NO                       | NO SABE                  | SÍ                                                        | NO                       | NO SABE                  | SÍ                                                                              | NO                       | NO SABE                  |
| 01                                                                                                                                    | _____ | <input type="checkbox"/>                                                | <input type="checkbox"/> | <input type="checkbox"/> | <input type="checkbox"/>                                     | <input type="checkbox"/> | <input type="checkbox"/> | <input type="checkbox"/>                                                                                  | <input type="checkbox"/> | <input type="checkbox"/> | <input type="checkbox"/>                                  | <input type="checkbox"/> | <input type="checkbox"/> | <input type="checkbox"/>                                                        | <input type="checkbox"/> | <input type="checkbox"/> |
| 02                                                                                                                                    | _____ | <input type="checkbox"/>                                                | <input type="checkbox"/> | <input type="checkbox"/> | <input type="checkbox"/>                                     | <input type="checkbox"/> | <input type="checkbox"/> | <input type="checkbox"/>                                                                                  | <input type="checkbox"/> | <input type="checkbox"/> | <input type="checkbox"/>                                  | <input type="checkbox"/> | <input type="checkbox"/> | <input type="checkbox"/>                                                        | <input type="checkbox"/> | <input type="checkbox"/> |
| 03                                                                                                                                    | _____ | <input type="checkbox"/>                                                | <input type="checkbox"/> | <input type="checkbox"/> | <input type="checkbox"/>                                     | <input type="checkbox"/> | <input type="checkbox"/> | <input type="checkbox"/>                                                                                  | <input type="checkbox"/> | <input type="checkbox"/> | <input type="checkbox"/>                                  | <input type="checkbox"/> | <input type="checkbox"/> | <input type="checkbox"/>                                                        | <input type="checkbox"/> | <input type="checkbox"/> |
| 04                                                                                                                                    | _____ | <input type="checkbox"/>                                                | <input type="checkbox"/> | <input type="checkbox"/> | <input type="checkbox"/>                                     | <input type="checkbox"/> | <input type="checkbox"/> | <input type="checkbox"/>                                                                                  | <input type="checkbox"/> | <input type="checkbox"/> | <input type="checkbox"/>                                  | <input type="checkbox"/> | <input type="checkbox"/> | <input type="checkbox"/>                                                        | <input type="checkbox"/> | <input type="checkbox"/> |
| 05                                                                                                                                    | _____ | <input type="checkbox"/>                                                | <input type="checkbox"/> | <input type="checkbox"/> | <input type="checkbox"/>                                     | <input type="checkbox"/> | <input type="checkbox"/> | <input type="checkbox"/>                                                                                  | <input type="checkbox"/> | <input type="checkbox"/> | <input type="checkbox"/>                                  | <input type="checkbox"/> | <input type="checkbox"/> | <input type="checkbox"/>                                                        | <input type="checkbox"/> | <input type="checkbox"/> |
| No conozco personalmente a nadie que haya consumido <u>heroína o se haya inyectado drogas ilegales</u> en los <b>ÚLTIMOS 12 MESES</b> |       |                                                                         |                          |                          |                                                              |                          |                          |                                                                                                           |                          |                          |                                                           |                          |                          |                                                                                 | <input type="checkbox"/> | 1                        |

## JUEGO

**J1. En LOS ÚLTIMOS 12 MESES ¿Con qué frecuencia HA JUGADO DINERO?** Marque una casilla por columna.

|                                             | EN INTERNET                           | FUERA DE INTERNET                     |
|---------------------------------------------|---------------------------------------|---------------------------------------|
| UN DÍA AL MES o MENOS                       | <input type="checkbox"/> <sub>1</sub> | <input type="checkbox"/> <sub>1</sub> |
| 2-4 DÍAS AL MES                             | <input type="checkbox"/> <sub>2</sub> | <input type="checkbox"/> <sub>2</sub> |
| 2-3 DÍAS A LA SEMANA                        | <input type="checkbox"/> <sub>3</sub> | <input type="checkbox"/> <sub>3</sub> |
| 4-5 DÍAS A LA SEMANA                        | <input type="checkbox"/> <sub>4</sub> | <input type="checkbox"/> <sub>4</sub> |
| 6 o MÁS DÍAS A LA SEMANA                    | <input type="checkbox"/> <sub>5</sub> | <input type="checkbox"/> <sub>5</sub> |
| NO HE JUGADO DINERO EN LOS ÚLTIMOS 12 MESES | <input type="checkbox"/> <sub>0</sub> | <input type="checkbox"/> <sub>0</sub> |
| NUNCA HE JUGADO DINERO                      | <input type="checkbox"/> <sub>9</sub> | <input type="checkbox"/> <sub>9</sub> |

**J2. ¿Qué edad tenía la PRIMERA VEZ que jugó dinero?**

Ponga sobre las líneas los años que tenía o marque el recuadro correspondiente.

ANOTE LA **EDAD** que tenía la **primera vez** que **JUGÓ DINERO EN INTERNET**: \_\_\_\_\_ AÑOS

NUNCA HE JUGADO DINERO EN INTERNET  1

ANOTE LA **EDAD** que tenía la **primera vez** que **JUGÓ DINERO FUERA DE INTERNET**: \_\_\_\_\_ AÑOS

NUNCA HE JUGADO DINERO FUERA DE INTERNET  1

**J3. En LOS ÚLTIMOS 12 MESES ¿En qué juegos HA JUGADO DINERO?** Marque una o varias casillas.

|                                                                            | EN INTERNET                            | FUERA DE INTERNET                      |
|----------------------------------------------------------------------------|----------------------------------------|----------------------------------------|
| LOTERÍAS, PRIMITIVA, BONOLOTO, ONCE CUPONES, JUEGO ACTIVOEUROJACKPOT, 7/39 | <input type="checkbox"/> <sub>1</sub>  | <input type="checkbox"/> <sub>1</sub>  |
| LOTERÍAS INSTANTÁNEAS (RASCAS ONCE)                                        | <input type="checkbox"/> <sub>2</sub>  | <input type="checkbox"/> <sub>2</sub>  |
| QUINIELAS DE FÚTBOL Y/O QUINIGOL                                           | <input type="checkbox"/> <sub>3</sub>  | <input type="checkbox"/> <sub>3</sub>  |
| APUESTAS DEPORTIVAS                                                        | <input type="checkbox"/> <sub>4</sub>  | <input type="checkbox"/> <sub>4</sub>  |
| APUESTAS EN LAS CARRERAS DE CABALLOS                                       | <input type="checkbox"/> <sub>5</sub>  | <input type="checkbox"/> <sub>5</sub>  |
| SLOTS, MÁQUINAS DE AZAR/ TRAGAPERRAS                                       | <input type="checkbox"/> <sub>6</sub>  | <input type="checkbox"/> <sub>6</sub>  |
| JUEGOS DE CARTAS CON DINERO (PÓQUER, MUS, BLACKJACK, PUNTO Y BANCA...)     | <input type="checkbox"/> <sub>7</sub>  | <input type="checkbox"/> <sub>7</sub>  |
| BINGO                                                                      | <input type="checkbox"/> <sub>8</sub>  | <input type="checkbox"/> <sub>8</sub>  |
| VIDEOJUEGOS                                                                | <input type="checkbox"/> <sub>9</sub>  | <input type="checkbox"/> <sub>9</sub>  |
| JUEGOS EN CASINO                                                           | <input type="checkbox"/> <sub>10</sub> | <input type="checkbox"/> <sub>10</sub> |
| JUEGOS EN SALAS DE JUEGO                                                   | <input type="checkbox"/> <sub>11</sub> | <input type="checkbox"/> <sub>11</sub> |
| BOLSA DE VALORES                                                           | <input type="checkbox"/> <sub>12</sub> | <input type="checkbox"/> <sub>12</sub> |
| CONCURSOS (TELEVISIÓN, RADIO, PRENSA) CON APUESTA ECONÓMICA                | <input type="checkbox"/> <sub>13</sub> | <input type="checkbox"/> <sub>13</sub> |
| NO HE JUGADO DINERO EN LOS ÚLTIMOS 12 MESES                                | <input type="checkbox"/> <sub>19</sub> | <input type="checkbox"/> <sub>19</sub> |
| NUNCA HE JUGADO DINERO                                                     | <input type="checkbox"/> <sub>20</sub> | <input type="checkbox"/> <sub>20</sub> |

**J4. En los ÚLTIMOS 12 MESES, ¿Cuál ha sido la mayor cantidad de DINERO QUE SE HA GASTADO JUGANDO en un solo día? Marque una casilla por columna.**

|                      | Dinero que he jugado<br>EN INTERNET | Dinero que he jugado<br><u>FUERA DE INTERNET</u> |
|----------------------|-------------------------------------|--------------------------------------------------|
| MENOS DE 6 EUROS     | <input type="checkbox"/> 1          | <input type="checkbox"/> 1                       |
| ENTRE 6 Y 30 EUROS   | <input type="checkbox"/> 2          | <input type="checkbox"/> 2                       |
| ENTRE 31 Y 60 EUROS  | <input type="checkbox"/> 3          | <input type="checkbox"/> 3                       |
| ENTRE 61 Y 300 EUROS | <input type="checkbox"/> 4          | <input type="checkbox"/> 4                       |
| MÁS DE 300 EUROS     | <input type="checkbox"/> 5          | <input type="checkbox"/> 5                       |

|                                                |                            |                            |
|------------------------------------------------|----------------------------|----------------------------|
| NO HE JUGADO DINERO EN LOS<br>ÚLTIMOS 12 MESES | <input type="checkbox"/> 0 | <input type="checkbox"/> 0 |
| NUNCA HE JUGADO DINERO                         | <input type="checkbox"/> 9 | <input type="checkbox"/> 9 |

Ahora vamos a volver a preguntarle algunas cosas sobre **JUGAR CON DINERO EN LOS 12 ÚLTIMOS MESES**.

**Muy importante:**

- **SI NO HA JUGADO CON DINERO EN LOS ÚLTIMOS 12 MESES**, no conteste este bloque y pase a la pregunta INT1 (Internet)

- **SI HA JUGADO CON DINERO EN LOS ÚLTIMOS 12 MESES ya sea en internet o fuera de internet, DEBE CONTESTAR TODAS LAS PREGUNTAS** porque forman parte de un cuestionario y deben analizarse conjuntamente.

**J5. ¿Conteste si le ha ocurrido (sí/no) algo de lo que se describe a continuación en los ÚLTIMOS 12 MESES? Marque una casilla por línea.**

|                                                                                                                                                                                                           | SÍ                         | NO                         |
|-----------------------------------------------------------------------------------------------------------------------------------------------------------------------------------------------------------|----------------------------|----------------------------|
| HA TENIDO LA NECESIDAD DE APOSTAR <b>CANTIDADES DE DINERO CADA VEZ MAYORES</b> PARA CONSEGUIR LA EXCITACIÓN DESEADA.                                                                                      | <input type="checkbox"/> 1 | <input type="checkbox"/> 2 |
| HA ESTADO <b>NERVIOSO O IRRITADO</b> CUANDO HA <b>INTENTADO REDUCIR</b> O ABANDONAR EL JUEGO.                                                                                                             | <input type="checkbox"/> 1 | <input type="checkbox"/> 2 |
| HA HECHO ESFUERZOS REPETIDOS PARA <b>CONTROLAR, REDUCIR O ABANDONAR</b> EL JUEGO, SIEMPRE SIN ÉXITO.                                                                                                      | <input type="checkbox"/> 1 | <input type="checkbox"/> 2 |
| A MENUDO HA TENIDO LA <b>MENTE OCUPADA EN LAS APUESTAS</b> (P. EJ. REVIVIENDO EXPERIENCIAS DE APUESTAS PASADAS, PLANIFICANDO SU PRÓXIMA APUESTA, PENSANDO EN FORMAS DE CONSEGUIR DINERO PARA APOSTAR...). | <input type="checkbox"/> 1 | <input type="checkbox"/> 2 |
| A MENUDO HA <b>JUGADO CUANDO SENTÍA DESASOSIEGO</b> (P. EJ. CULPABILIDAD, ANSIEDAD, DEPRESIÓN).                                                                                                           | <input type="checkbox"/> 1 | <input type="checkbox"/> 2 |
| DESPUÉS DE PERDER DINERO EN LAS APUESTAS, HA VUELTO A <b>JUGAR OTRO DÍA PARA INTENTAR GANAR</b> Y ASÍ RECUPERAR EL DINERO PERDIDO.                                                                        | <input type="checkbox"/> 1 | <input type="checkbox"/> 2 |
| HA <b>MENTIDO</b> PARA OCULTAR SU GRADO DE IMPLICACIÓN EN EL JUEGO.                                                                                                                                       | <input type="checkbox"/> 1 | <input type="checkbox"/> 2 |
| <b>HA PUESTO EN PELIGRO O HA PERDIDO</b> ALGUNA <b>RELACIÓN</b> IMPORTANTE, SU <b>EMPLEO</b> U OPORTUNIDADES EN SUS ESTUDIOS O EN SU CARRERA PROFESIONAL A CAUSA DEL JUEGO.                               | <input type="checkbox"/> 1 | <input type="checkbox"/> 2 |
| CUENTA CON LOS DEMÁS PARA QUE <b>LE DEN DINERO</b> PARA ALIVIAR SU GRAVE SITUACIÓN FINANCIERA PROVOCADA POR EL JUEGO,                                                                                     | <input type="checkbox"/> 1 | <input type="checkbox"/> 2 |

## INTERNET

**INT1.** Por favor, lea las afirmaciones siguientes respecto al uso de **INTERNET** (chateando, mandando o recibiendo e-mails, whatsApps, usando redes sociales, jugando con o sin dinero, escuchando o descargándose música, viendo o descargándose videos...). Indique cada cuanto tiempo le ocurren las siguientes situaciones. (No tenga en cuenta el tiempo que emplea en internet para hacer deberes o trabajar, sólo indique aquí el tiempo que emplea en internet por diversión). Marque una casilla por línea.

|                                                                                                                                | NUNCA                                 | RARA VEZ                              | ALGUNA VEZ                            | A MENUDO                              | MUY FRECUENTEMENTE                    |
|--------------------------------------------------------------------------------------------------------------------------------|---------------------------------------|---------------------------------------|---------------------------------------|---------------------------------------|---------------------------------------|
| ¿Con qué frecuencia le ha resultado difícil <b>dejar de usar internet</b> cuando estaba conectado?                             | <input type="checkbox"/> <sub>0</sub> | <input type="checkbox"/> <sub>1</sub> | <input type="checkbox"/> <sub>2</sub> | <input type="checkbox"/> <sub>3</sub> | <input type="checkbox"/> <sub>4</sub> |
| ¿Con qué frecuencia ha seguido <b>conectado</b> a internet <b>a pesar de querer parar</b> ?                                    | <input type="checkbox"/> <sub>0</sub> | <input type="checkbox"/> <sub>1</sub> | <input type="checkbox"/> <sub>2</sub> | <input type="checkbox"/> <sub>3</sub> | <input type="checkbox"/> <sub>4</sub> |
| ¿Con qué frecuencia sus padres, o amigos le dicen que <b>debería pasar menos tiempo</b> en internet?                           | <input type="checkbox"/> <sub>0</sub> | <input type="checkbox"/> <sub>1</sub> | <input type="checkbox"/> <sub>2</sub> | <input type="checkbox"/> <sub>3</sub> | <input type="checkbox"/> <sub>4</sub> |
| ¿Con qué frecuencia <b>prefiere conectarse a internet</b> en vez de pasar el tiempo con otros (padres, amigos...)?             | <input type="checkbox"/> <sub>0</sub> | <input type="checkbox"/> <sub>1</sub> | <input type="checkbox"/> <sub>2</sub> | <input type="checkbox"/> <sub>3</sub> | <input type="checkbox"/> <sub>4</sub> |
| ¿Con qué frecuencia <b>duerme menos</b> por estar conectado a internet?                                                        | <input type="checkbox"/> <sub>0</sub> | <input type="checkbox"/> <sub>1</sub> | <input type="checkbox"/> <sub>2</sub> | <input type="checkbox"/> <sub>3</sub> | <input type="checkbox"/> <sub>4</sub> |
| ¿Con qué frecuencia se encuentra <b>pensando en internet</b> , aunque no esté conectado?                                       | <input type="checkbox"/> <sub>0</sub> | <input type="checkbox"/> <sub>1</sub> | <input type="checkbox"/> <sub>2</sub> | <input type="checkbox"/> <sub>3</sub> | <input type="checkbox"/> <sub>4</sub> |
| ¿Con qué frecuencia <b>está deseando conectarse</b> a internet?                                                                | <input type="checkbox"/> <sub>0</sub> | <input type="checkbox"/> <sub>1</sub> | <input type="checkbox"/> <sub>2</sub> | <input type="checkbox"/> <sub>3</sub> | <input type="checkbox"/> <sub>4</sub> |
| ¿Con qué frecuencia piensa que <b>debería usar menos internet</b> ?                                                            | <input type="checkbox"/> <sub>0</sub> | <input type="checkbox"/> <sub>1</sub> | <input type="checkbox"/> <sub>2</sub> | <input type="checkbox"/> <sub>3</sub> | <input type="checkbox"/> <sub>4</sub> |
| ¿Con qué frecuencia <b>ha intentado pasar menos tiempo</b> conectado a internet y no lo ha conseguido?                         | <input type="checkbox"/> <sub>0</sub> | <input type="checkbox"/> <sub>1</sub> | <input type="checkbox"/> <sub>2</sub> | <input type="checkbox"/> <sub>3</sub> | <input type="checkbox"/> <sub>4</sub> |
| ¿Con qué frecuencia intenta <b>terminar su trabajo a toda prisa</b> para conectarse a internet?                                | <input type="checkbox"/> <sub>0</sub> | <input type="checkbox"/> <sub>1</sub> | <input type="checkbox"/> <sub>2</sub> | <input type="checkbox"/> <sub>3</sub> | <input type="checkbox"/> <sub>4</sub> |
| ¿Con qué frecuencia <b>descuida sus obligaciones</b> (deberes, estar con la familia...) porque prefiere conectarse a internet? | <input type="checkbox"/> <sub>0</sub> | <input type="checkbox"/> <sub>1</sub> | <input type="checkbox"/> <sub>2</sub> | <input type="checkbox"/> <sub>3</sub> | <input type="checkbox"/> <sub>4</sub> |
| ¿Con qué frecuencia <b>se conecta</b> a internet cuando estas "de bajón"?                                                      | <input type="checkbox"/> <sub>0</sub> | <input type="checkbox"/> <sub>1</sub> | <input type="checkbox"/> <sub>2</sub> | <input type="checkbox"/> <sub>3</sub> | <input type="checkbox"/> <sub>4</sub> |
| ¿Con qué frecuencia <b>se conecta</b> a internet para <b>olvidar sus penas o sentimientos negativos</b> ?                      | <input type="checkbox"/> <sub>0</sub> | <input type="checkbox"/> <sub>1</sub> | <input type="checkbox"/> <sub>2</sub> | <input type="checkbox"/> <sub>3</sub> | <input type="checkbox"/> <sub>4</sub> |
| ¿Con qué frecuencia se siente <b>inquieto, frustrado o irritado si no puede usar internet</b> ?                                | <input type="checkbox"/> <sub>0</sub> | <input type="checkbox"/> <sub>1</sub> | <input type="checkbox"/> <sub>2</sub> | <input type="checkbox"/> <sub>3</sub> | <input type="checkbox"/> <sub>4</sub> |
| ¿Con qué frecuencia se ha sentido <b>acosado, amenazado</b> o cree que le han hecho <b>bullying</b> a través de internet?      | <input type="checkbox"/> <sub>0</sub> | <input type="checkbox"/> <sub>1</sub> | <input type="checkbox"/> <sub>2</sub> | <input type="checkbox"/> <sub>3</sub> | <input type="checkbox"/> <sub>4</sub> |

## SALUD

**S1. Señale si ALGUNA VEZ EN LA VIDA el consumo de medicamentos, alcohol u otras drogas le han producido a Vd. alguno de los siguientes PROBLEMAS.**

Marque todas las que considere.

|                                                                                                                   |                          |    |
|-------------------------------------------------------------------------------------------------------------------|--------------------------|----|
| PELEAS O PROBLEMAS CON <b>FAMILIARES, AMIGOS, COMPAÑEROS</b> O VECINOS                                            | <input type="checkbox"/> | 1  |
| PROBLEMAS DE <b>SALUD FÍSICA</b> (ARRITMIAS, DESMAYO, ASMA) O NECESIDAD DE ACUDIR A UN CENTRO DE URGENCIAS        | <input type="checkbox"/> | 2  |
| PROBLEMAS <b>PSICOLÓGICOS</b> O PSIQUIÁTRICOS (DEPRESIÓN, ANSIEDAD, ESQUIZOFRENIA, PARANOIA, CRISIS DE PÁNICO...) | <input type="checkbox"/> | 3  |
| <b>ACCIDENTES DE TRÁFICO</b>                                                                                      | <input type="checkbox"/> | 4  |
| PROBLEMAS <b>LABORALES</b> (ACCIDENTES, DESPIDOS O SANCIONES...)                                                  | <input type="checkbox"/> | 5  |
| PROBLEMAS <b>ECONÓMICOS</b>                                                                                       | <input type="checkbox"/> | 6  |
| PROBLEMAS CON LA <b>POLICÍA O LA LEY</b>                                                                          | <input type="checkbox"/> | 7  |
| RELACIONES <b>SEXUALES</b> QUE EN OTRAS CIRCUNSTANCIAS NO HUBIERA MANTENIDO                                       | <input type="checkbox"/> | 8  |
| RELACIONES <b>SEXUALES SIN PROTECCIÓN</b>                                                                         | <input type="checkbox"/> | 9  |
| HE SIDO VÍCTIMA DE UNA SITUACIÓN DE <b>VIOLENCIA DE GÉNERO</b> POR MI PAREJA O EXPAREJA                           | <input type="checkbox"/> | 10 |
| NUNCA HE TENIDO PROBLEMAS DE ESTE TIPO                                                                            | <input type="checkbox"/> | 11 |
| NUNCA HE CONSUMIDO ALCOHOL U OTRAS DROGAS                                                                         | <input type="checkbox"/> | 12 |

**S2. EN ALGÚN MOMENTO DE SU VIDA, ha sido Vd. diagnosticado de:**

Marque todas las que considere.

|                                                             |                          |    |
|-------------------------------------------------------------|--------------------------|----|
| LUDOPATÍA (PROBLEMAS CON EL JUEGO)                          | <input type="checkbox"/> | 1  |
| ANSIEDAD                                                    | <input type="checkbox"/> | 2  |
| DEPRESIÓN                                                   | <input type="checkbox"/> | 3  |
| INSOMNIO (PROBLEMAS PARA DORMIR)                            | <input type="checkbox"/> | 4  |
| TDAH (TRASTORNO POR DEFICIT DE ATENCIÓN CON HIPERACTIVIDAD) | <input type="checkbox"/> | 5  |
| ESQUIZOFRENIA U OTRAS ENFERMEDADES SIMILARES                | <input type="checkbox"/> | 6  |
| TRASTORNO BIPOLAR                                           | <input type="checkbox"/> | 7  |
| TRASTORNO DE PERSONALIDAD                                   | <input type="checkbox"/> | 8  |
| TRASTORNOS DE LA ALIMENTACIÓN (ANOREXIA, BULIMIA)           | <input type="checkbox"/> | 9  |
| VIRUS DEL SIDA (VIH)                                        | <input type="checkbox"/> | 10 |
| VIRUS DE LA HEPATITIS B                                     | <input type="checkbox"/> | 11 |
| VIRUS DE LA HEPATITIS C                                     | <input type="checkbox"/> | 12 |
| NINGUNO DE LOS MENCIONADOS                                  | <input type="checkbox"/> | 13 |
| NO DESEO CONTESTAR                                          | <input type="checkbox"/> | 14 |

**USTED HA TERMINADO EL CUESTIONARIO AUTORRELLENABLE.  
INTRODÚZCALO EN EL SOBRE Y ENTRÉGUESELO AL ENTREVISTADOR/A.  
GRACIAS POR SU COLABORACIÓN.**

**ENTREVISTADOR/A: PASAR A BLOQUE DE PREGUNTAS DE "RIESGO Y OTRAS CUESTIONES"  
EN EL CUADERNILLO DEL ENTREVISTADOR/A**
